# Supplementary material for: Metabolite Profiling Reveals the Dynamic Changes in Non-Volatiles and Volatiles during the Enzymatic-Catalyzed Processing of Aijiao Oolong Tea
Source: Plants (Basel). 2024 Apr 30;13(9):1249. doi: 10.3390/plants13091249 (PMC11085110; doi:10.3390/plants13091249)
Supplement: Supplementary file 1 [file plants-13-01249-s001.zip › Supplementary tables.xlsx]

## Sheet: Table S1
Table S1. The information on 306 non-volatile metabolites
No.	Name	mz	rt	exact_mass	ppm	Category	FTL	WTL	ZTL	DTL
1	(-)-Catechin gallate	441.089	553.809	442.09	13.3115	Tannins	24212400.93±1726574.80	1718807358.98±38297934.45	104818300.26±43653157.38	21470295.13±1890451.51
2	(-)-Epiafzelechin	273.076	492.825	274.084	2.66852	Tannins	1891605674.81±266725144.72	25237758422.09±40313916.74	3415456399.05±168656990.13	2850238005.01±91643751.26
3	(-)-Epicatechin gallate	441.081	508.257	442.09	3.84393	Tannins	35615795218.81±10053376217.78	68476631460.33±18794834851.50	56610482449.33±16186047675.30	58928902176.18±1117844705.85
4	(-)-Epigallocatechin	305.066	398.747	306.074	2.35867	Tannins	57968736953.37±6462939462.31	45143247628.66±1163104798.17	78997975853.56±3724426420.59	67231751271.73±2938352840.75
5	(+)-Gallocatechin	289.07	559.876	306.074	10.9478	Tannins	227920806.67±36816464.95	1515886362.41±11309493.54	410236804.71±62996014.28	361272112.33±61706561.82
6	Afzelechin	275.091	494.344	274.084	2.30234	Tannins	1347087445.54±145273753.28	5475166085.90±50458652.17	2742345958.81±156308706.87	2489506522.49±86419216.11
7	Catechin	289.072	424.134	290.079	0.0667943	Tannins	5172280726.06±860145771.51	14874735117.25±851395387.73	7723627527.18±168387299.81	6281202557.86±143804133.41
8	Epicatechin	291.086	455.553	290.079	1.67356	Tannins	16777537314.86±750986398.02	55849185588.64±617186859.51	21241273486.89±974744829.94	19700558581.78±614223453.20
9	Epigallocatechin gallate	457.082	454.69	458.085	5.35067	Tannins	49342584665.40±11486320152.68	45200718115.34±7837456745.37	76192701310.46±2405426818.33	68255712675.71±5507768401.03
10	Epitheaflagallin 3-O-gallate	551.08	573.245	552.09	4.83245	Tannins	60822012.35±7424156.88	26138438.35±4723736.19	22808139.26±8500297.31	74463061.76±10516055.87
11	Procyanidin A1	576.124	420.139	576.127	5.04242	Tannins	9732972.32±4194072.95	339043603.36±4545935.36	28204471.06±4655646.90	21056698.10±14453804.99
12	Procyanidin B2	577.142	411.4	578.142	10.8977	Tannins	345108066.82±49463638.23	439085824.15±24259282.72	496172473.04±48203607.67	505353415.69±92189240.27
13	2-Chloro-L-phenylalanine	198.032	373.094	199.04	1.75619	Amino acids and their derivatives	266563231.43±2368315.61	118836988.90±5863443.62	203440791.25±4016996.02	193430699.70±3195901.22
14	3-Amino-4-hydroxybenzoate	154.05	145.379	153.043	0.0384816	Amino acids and their derivatives	40488728.67±4145883.59	259506482.93±941784.48	6606973.88±1153119.04	6206672.22±189490.83
15	3-Hydroxy-L-phenylalanine	181.072	423.79	181.074	10.4713	Amino acids and their derivatives	466033158.27±32090488.04	272212620.38±11494871.00	605601874.01±91521154.46	608536666.39±26382126.43
16	5-Hydroxy-L-tryptophan	221.092	311.321	220.085	1.52624	Amino acids and their derivatives	1778753.13±139832.68	71760463.85±5325249.98	33300496.72±4370071.17	17503043.23±1914057.89
17	Acetylcysteine	162.997	60.047	163.03	5.3497	Amino acids and their derivatives	101908961.00±2993312.75	58361145.94±14953191.70	114934191.54±5479030.90	117074586.43±39186218.07
18	Carglumic acid	189.056	290.895	190.059	20.5474	Amino acids and their derivatives	691637.04±122008.91	60288883.96±41181.83	4047019.03±235052.19	3530217.69±81304.22
19	Diaminopimelic acid	173.092	92.6445	190.095	23.5748	Amino acids and their derivatives	88780844.20±11262223.27	79621232.99±3748152.12	88245130.71±2951762.44	85299386.53±1295988.51
20	Dimethylglycine	102.056	78.0762	103.063	0.0528724	Amino acids and their derivatives	9416776.60±1284906.73	69184220.51±1224019.80	32494684.80±948035.01	19359044.60±228801.13
21	Glycylleucine	189.123	293.642	188.116	0.817601	Amino acids and their derivatives	31393894.21±10350230.32	93135973.82±23287994.24	78174766.56±16563343.41	66297406.41±19237003.31
22	Hydroxyisoleucine	148.097	96.3963	147.09	0.243653	Amino acids and their derivatives	136145563.72±6476238.20	56909976.42±6794237.36	61521676.36±3881991.67	62058405.43±202833.13
23	L-4-Hydroxyphenylglycine	167.012	69.7645	167.058	2.62276	Amino acids and their derivatives	60475578.33±8514514.70	137587864.21±11917186.69	39096255.92±7372595.04	39747974.12±11012211.70
24	L-Arginine	175.119	80.4525	174.112	0.266933	Amino acids and their derivatives	98321473.73±18516307.14	126244085.91±14139153.03	96938964.14±9587348.66	156139588.55±17900187.41
25	L-Aspartic acid	134.045	484.822	133.037	0.012353	Amino acids and their derivatives	32856722.69±3781482.59	17391391.30±0.00	0.00±0.00	34566458.10±1441377.35
26	L-Glutamic acid	128.035	102.3	147.053	2.7518	Amino acids and their derivatives	121286028.87±16556495.72	1054653538.79±22712832.27	29959034.77±19965217.12	51614478.67±25594922.69
27	L-Glutamine	147.076	84.4697	146.069	1.11133	Amino acids and their derivatives	664313282.99±26142377.87	1038579985.87±248654286.91	1636501189.16±119928425.18	2721273084.38±67976631.97
28	L-Histidine	156.077	177.689	155.07	0.996075	Amino acids and their derivatives	71385527.42±8201348.35	22798192.96±109277.32	2666648.14±85538.93	2798296.80±144599.72
29	L-Homoserine	120.066	155.157	119.058	0.9566	Amino acids and their derivatives	39538344.01±5388749.76	1234690959.63±472423.25	55870322.21±11185794.91	61252774.35±11210451.32
30	L-Isoleucine	132.102	196.163	131.095	0.00717691	Amino acids and their derivatives	3591422651.55±483616539.70	2147837114.89±10872423.81	4030162721.24±62934612.12	7642652829.87±183656549.34
31	L-Leucine	132.102	218.102	131.095	0.119584	Amino acids and their derivatives	3320950224.82±475084492.72	940111331.44±49026284.44	4602090476.71±110077007.40	7448199420.52±31938783.60
32	L-Lysine	147.113	74.4628	146.106	0.843335	Amino acids and their derivatives	27422446.19±2543561.11	272463851.60±338502.45	15430415.65±514533.16	37384338.10±1508262.41
33	L-Lysine 1,6-lactam	129.102	122.421	128.095	1.92681	Amino acids and their derivatives	255425177.63±33130342.10	268876943.15±47513465.73	529424863.13±23288221.13	534213568.48±117539624.53
34	L-lysine hydrochloride	183.076	283.35	182.649	23.5924	Amino acids and their derivatives	56720731.02±7598757.24	135371075.51±289864.39	3641579.19±454664.32	61172180.49±4463443.26
35	L-Malic acid	133.05	96.131	134.022	5.89484	Amino acids and their derivatives	294202387.47±81385953.34	156571290.59±9630644.01	153227344.71±72419201.10	175812217.62±85136500.16
36	L-Methionine	150.058	141.818	149.051	0.1743	Amino acids and their derivatives	4725238.81±1243127.72	39311258.23±17186563.52	54745074.04±14756199.14	117496632.61±15309431.08
37	L-Methionine S-oxide	166.053	88.5471	165.046	0.415757	Amino acids and their derivatives	35567275.94±3137802.00	1259078716.68±3241316.25	39038343.26±3048467.45	72676723.99±7207645.05
38	L-Phenylalanine	166.086	335.497	165.079	0.000132732	Amino acids and their derivatives	12218448471.30±1552208193.48	1256359190.38±34204255.41	5193165281.72±144584953.24	19726698162.01±384910073.49
39	L-Proline	116.071	332.795	115.063	0.585309	Amino acids and their derivatives	22481314.88±579666.57	33454239.01±1188549.96	28286540.89±5124222.49	42165146.37±23454193.61
40	L-Serine	104.035	84.4762	105.043	0.542594	Amino acids and their derivatives	38962687.58±3261288.77	217258606.70±1147607.13	60342397.50±2191619.84	73908123.25±2662083.46
41	L-Theanine	155.082	121.989	174.1	2.84123	Amino acids and their derivatives	182221852.21±28590156.39	1655102121.71±74522841.58	253072248.10±20305061.02	244306845.68±22776991.93
42	L-Tryptophan	205.097	394.926	204.09	0.221856	Amino acids and their derivatives	4623359299.38±601881886.21	2178544713.87±107256984.54	3616919018.53±43462641.72	10445973927.61±178539075.21
43	L-Tyrosine	182.081	190.916	181.074	0.712591	Amino acids and their derivatives	3471836089.63±532129462.51	732296322.65±16551169.31	2963077215.20±125617399.28	7199797600.53±72462855.69
44	L-Valine	116.072	99.5008	117.079	1.2172	Amino acids and their derivatives	73718848.28±11925496.28	50437197.56±1475258.47	42109382.29±2595308.99	124622525.48±3890920.41
45	N-Acetyl-DL-tryptophan	246.242	659.185	246.1	4.91985	Amino acids and their derivatives	108187458.48±31072737.86	42773396.80±16029585.50	73131753.45±21622306.90	104931769.96±19334642.12
46	N-Acetyl-L-phenylalanine	206.082	168.088	207.089	0.141205	Amino acids and their derivatives	557942.67±90953.28	4494660.61±5179313.54	9655213.43±334335.97	11663689.85±169575.16
47	N-Acetylleucine	172.098	337.852	173.105	0.598991	Amino acids and their derivatives	10995158.69±1571929.08	2009532145.75±40909.51	2659896.17±160473.24	7351608.61±355761.59
48	N-Alpha-acetyllysine	188.07	394.869	188.116	1.43062	Amino acids and their derivatives	6335749662.84±846480888.05	2029229787.27±167063892.89	5075690825.96±71014314.32	14208775120.86±134866505.01
49	N-Formyl-L-glutamic acid	176.055	184.737	175.048	0.499869	Amino acids and their derivatives	37782275.18±1716619.57	36612946.45±3630894.35	37513406.80±1815331.84	39375838.72±1078124.19
50	N-Formyl-L-methionine	176.972	53.6296	177.046	1.56475	Amino acids and their derivatives	20042985.89±13726341.29	17665085.31±9482523.62	27703882.81±6280185.68	20876960.97±9031200.18
51	N-methyl-L-glutamic Acid	144.066	339.322	161.069	29.429	Amino acids and their derivatives	76455203.98±13715639.14	81697713.35±37511.81	2269653.68±123865.15	1911159.55±39758.80
52	N6-Acetyl-L-lysine	189.123	171.896	188.116	0.346359	Amino acids and their derivatives	94802472.41±14542085.89	127163121.34±19939399.22	139809004.58±43835213.17	109992554.62±39979702.37
53	O-Acetyl-L-homoserine	162.076	155.642	161.069	0.047323	Amino acids and their derivatives	75070671.44±38649728.09	158976897.84±44440418.86	89718495.76±44099206.93	94385637.64±43177820.88
54	Pyroglutamic acid	128.035	89.2574	129.043	2.88092	Amino acids and their derivatives	1710185783.51±324935083.48	268560445.06±53758327.21	121408368.56±21694847.20	160041854.90±8209998.35
55	Pyrrolidonecarboxylic acid	130.05	122.06	129.043	0.16494	Amino acids and their derivatives	194910391.13±219858916.39	166027335.02±16638728.96	195123981.93±90775978.55	336240260.18±19646264.17
56	S-Adenosylmethionine	398.24	794.187	398.137	1.86085	Amino acids and their derivatives	30307696.23±7766842.47	11486937.09±5273391.81	32479168.48±2592984.01	33361536.45±3347442.30
57	Tryptamine	161.107	422.202	160.1	0.00705333	Amino acids and their derivatives	35672635.86±5984603.30	24557973.74±94534.21	4667108.32±517824.54	2964346.33±2098414.25
58	Tryptophanol	144.081	394.926	161.084	28.0333	Amino acids and their derivatives	72752902.67±9612066.85	52449921.90±2542764.84	57079882.38±724592.55	156152383.91±2438872.91
59	Tyramine	138.091	337.795	137.084	1.07037	Amino acids and their derivatives	26788523.13±9580945.09	37282995.55±1728735.42	61074223.39±3290517.07	63175227.24±2454160.66
60	Vigabatrin	112.075	378.709	129.079	29.7999	Amino acids and their derivatives	2731972137.28±211156834.23	8045077.17±300554.07	13702061.52±137482.71	47105914.60±45814901.49
61	2-Hydroxy-3-(4-hydroxyphenyl)propanoic acid	183.102	728.552	182.058	1.65155	Phenolic acids	29985167.53±4536371.48	26874297.92±231292.46	1160168.23±238461.13	1256048.49±332444.17
62	2-Hydroxy-3-(4-hydroxyphenyl)propenoic acid	181.053	168.497	180.042	17.817	Phenolic acids	46279419.57±4692652.12	342715299.30±2656716.93	63335456.42±3513337.20	67385358.34±2024172.80
63	2,4-Dihydroxy-6-methylbenzoic acid	169.05	403.273	168.042	0.131294	Phenolic acids	442519068.52±32994288.08	333539443.65±11841613.62	595153115.71±12318553.56	546965101.35±7252387.83
64	3-(2-Hydroxyphenyl)propanoic acid	149.06	494.35	166.063	26.8158	Phenolic acids	20430196.39±2088981.48	28786324.62±709235.29	35657675.62±2010220.52	37278978.14±4378624.89
65	3-Hydroxybenzoic acid	137.025	610.941	138.032	6.7626	Phenolic acids	4115517.45±258627.33	37588099.02±4703507.30	16781290.34±2815498.27	25047560.57±7174668.65
66	4-Hydroxybenzoic acid	137.024	521.841	138.032	2.01403	Phenolic acids	35102617.16±12771971.10	71931663.96±2487181.53	40771851.13±5883201.88	46584702.73±2851442.47
67	4-Hydroxycinnamic acid	163.04	317.482	164.047	0.533523	Phenolic acids	367229103.66±39141318.45	69194491.26±12200839.84	101958003.55±5632691.50	99352449.49±11475483.33
68	5-Acetylsalicylic acid	181.07	662.048	180.042	4.01005	Phenolic acids	71685043.76±35267058.24	45505269.85±18269123.78	50628466.91±24364256.58	46603966.36±37380147.20
69	Caffeate	181.049	381.926	180.042	1.02311	Phenolic acids	16700961.66±8766182.50	282394360.51±5529754.47	35316523.67±634538.60	19990882.47±8987790.94
70	Chlorogenic acid	355.101	423.29	354.095	4.34291	Phenolic acids	154004311.18±19007167.55	266751799.69±26948431.45	379759887.85±61158937.51	178499311.67±15851078.51
71	Dattelic acid	337.092	464.805	336.084	0.624534	Phenolic acids	7905001.44±3531399.32	16167147.73±419178.85	36550278.16±3081422.69	9016380.97±3686979.74
72	Ellagic acid	303.012	412.439	302.006	3.63638	Phenolic acids	22878173.75±1703261.16	57049896.03±666234.64	16435076.49±823104.67	20543803.98±2407973.54
73	Gallic acid	171.029	293.963	170.022	0.557746	Phenolic acids	161136420.39±2008473.25	106457588.24±3914189.62	101271399.27±406432.98	102282457.76±3649644.22
74	Isochlorogenic acid b	499.123	533.81	516.127	7.33324	Phenolic acids	24985886.99±4385358.24	166340414.93±4594092.47	76810089.11±5140548.89	27331030.55±12721279.41
75	m-Coumaric acid	163.04	559.512	164.047	0.230261	Phenolic acids	60295981.15±8484390.92	134594304.53±51613610.32	142392893.41±57671743.48	77042779.62±2916729.07
76	Methyl ferulate	191.07	417.677	208.074	20.2434	Phenolic acids	5506487.76±474883.79	1017921858.86±1188473.17	49042223.35±2988513.48	44480504.26±1607943.75
77	Methyl gallate	183.029	439.605	184.037	1.8804	Phenolic acids	669184416.12±81334531.12	1080792457.59±108680906.13	1888152346.78±117289461.58	1703202501.68±101861006.28
78	Neochlorogenic acid	335.076	352.678	354.095	2.87824	Phenolic acids	46823927.14±25184708.07	91031029.07±4273047.11	154249777.05±9621933.65	82828802.63±3503343.04
79	p-Hydroxyphenylacetic acid	151.04	404.618	152.047	0.100276	Phenolic acids	27910574.83±5703766.43	39579935.43±152477.18	1689219.86±106813.38	2149528.62±52714.31
80	Protocatechuic acid	153.019	499.988	154.027	0.509359	Phenolic acids	656405316.40±64531219.63	46074125.97±6866762.58	75620773.87±4844623.81	62928877.67±868106.08
81	Salicylic acid	139.112	710.184	138.032	0.579222	Phenolic acids	18959684.20±3327170.58	27943545.69±2350042.31	12060275.17±2446325.89	15417846.04±2892389.79
82	Shikimic acid	173.047	347.78	174.053	9.06772	Phenolic acids	40303459.79±16827490.99	63616204.99±15699114.80	41526186.25±11735336.28	33465442.11±13086354.15
83	trans-Ferulic acid	177.054	475.982	194.058	22.2337	Phenolic acids	46792849.81±4717791.00	49019437.98±10867434.70	75658435.17±14131805.93	81637983.09±11988790.82
84	Vanillate	167.035	525.419	168.042	1.2074	Phenolic acids	20885095.02±5381901.56	45560725.12±8458130.34	35625861.74±22825442.63	38268087.44±15768547.54
85	1,7-Dimethylxanthine	181.073	481.15	180.065	7.86711	Nucleotides and derivatives	70135366.34±64217311.40	48091369.79±38375953.97	53886935.94±20630892.88	67907841.99±63435603.70
86	2-O-Methyladenosine	282.119	319.802	NULL	2.63439	Nucleotides and derivatives	33043253.58±1838552.79	14086949.14±1046203.61	15553520.20±539157.24	34467432.86±1371747.73
87	3-AMP	348.068	98.1227	347.063	8.14666	Nucleotides and derivatives	67974370.88±8927705.37	215576186.97±6681503.21	17887733.84±7211708.99	18261871.40±8122665.95
88	3-Methylxanthine	167.056	307.139	166.049	0.452599	Nucleotides and derivatives	686256853.51±72390923.14	210970786.77±11726582.57	431698246.18±27690539.95	751398555.81±21988594.24
89	5-Deoxyadenosine	252.109	272.909	251.102	0.649807	Nucleotides and derivatives	72580987.49±2064836.47	1337444.47±1469403.81	2672901.20±1141664.15	1572977.60±841729.58
90	5-Methylthioadenosine	296.082	431.452	297.09	1.93067	Nucleotides and derivatives	40287447.67±12808248.22	12873519.78±49158.70	3724462.70±3455654.48	7347499.35±758503.71
91	6-Methylmercaptopurine	165.019	466.778	166.031	21.8984	Nucleotides and derivatives	62109560.65±5006338.19	119999592.07±6532882.52	21623800.41±3394037.79	24137121.13±3636741.97
92	7-Methylguanine	166.072	155.701	165.065	0.0673033	Nucleotides and derivatives	156956051.53±23118238.32	125371774.06±13498415.42	179929094.97±5357845.91	209366079.68±14438941.83
93	Adenine	134.047	261.551	135.054	0.32323	Nucleotides and derivatives	271295600.07±27587733.72	56959205.06±3775170.43	40572900.30±2879733.51	110462201.66±2777243.57
94	Adenosine	268.103	243.032	267.097	1.26002	Nucleotides and derivatives	6329964424.18±517911868.48	56689634.50±11832061.90	78481773.42±4865073.69	113177128.39±6926468.78
95	AMP	348.068	140.296	347.063	5.60172	Nucleotides and derivatives	62891317.55±12450828.25	17687907.77±1388752.07	38024748.25±988948.22	38920568.37±3898908.73
96	Cyclic AMP	328.045	300.425	329.053	0.073299	Nucleotides and derivatives	72248770.75±9040971.69	1177362.73±6788.05	34940.69±6103.89	2734254.76±92730.61
97	Cytidine	242.078	148.372	243.085	0.0985587	Nucleotides and derivatives	15500802.83±1352883.92	27988428.29±63631.30	2661164.74±565396.06	6226910.29±143736.63
98	Deoxycytidine	227.164	475.718	227.091	2.83874	Nucleotides and derivatives	42636549.72±4485715.22	43834593.50±25848616.91	63117703.80±27453471.24	102358186.75±5111581.08
99	Deoxyinosine	253.093	426.149	252.086	2.15972	Nucleotides and derivatives	24046865.92±3004406.51	917718661.78±629786.92	29114444.41±698279.48	34110807.95±827911.18
100	Deoxyuridine	228.196	741.013	228.075	0.178367	Nucleotides and derivatives	1428541728.87±288596845.07	991624868.10±462039121.61	1585793117.59±325693868.15	1770280506.61±339904401.36
101	Dihydrouracil	112.988	98.7528	114.043	29.1235	Nucleotides and derivatives	25234407.89±3256587.67	92516675.31±9988714.65	99016707.98±51882328.58	87529249.51±28411391.02
102	GMP	346.054	207.94	363.058	9.67338	Nucleotides and derivatives	135654579.30±12007004.05	23188849.23±250861.86	3947855.22±288903.48	2474346.37±140062.69
103	Guanine	152.057	280.658	151.049	0.278893	Nucleotides and derivatives	236027832.82±27009046.20	48869385.19±2474415.87	46941467.36±5182945.80	80171046.88±5754191.24
104	Guanosine	284.099	280.69	283.092	0.254582	Nucleotides and derivatives	320314288.52±32648725.73	28401089.90±2034237.84	63365591.42±3332743.73	116374258.59±3436097.84
105	Guanosine 2,3-cyclic phosphate	346.055	186.121	345.047	0.754748	Nucleotides and derivatives	82099271.94±36272039.57	18342614.86±227594.81	3892847.18±1841821.26	1365516.42±62293.51
106	Hypoxanthine	137.046	147.661	136.038	0.565622	Nucleotides and derivatives	42606080.37±3703542.02	20626615.55±3667892.61	26829722.36±2577281.32	55862820.68±13970151.38
107	Inosine	267.074	270.94	268.081	0.224475	Nucleotides and derivatives	11536325.14±1933650.33	19610112.80±497856.08	4238803.64±88714.55	10818104.17±860977.51
108	Nicotinamide ribotide	334.293	726.372	334.057	5.38717	Nucleotides and derivatives	9992662.01±5364963.28	16422451.49±6147912.78	21957609.23±12716810.42	18227060.91±4273586.53
109	Riboflavin	377.148	447.335	376.138	7.22564	Nucleotides and derivatives	33746060.60±1104326.89	23151323.83±163937.25	519440.54±47147.80	1098853.14±178320.23
110	Thiamine	337.276	813.41	337.27	17.5657	Nucleotides and derivatives	10665490.11±2277995.71	25862370.41±45260239.65	20035609.05±11111822.61	64247029.27±47449128.03
111	Thymidine	223.028	755.657	242.09	0.783151	Nucleotides and derivatives	5909945.49±1127176.88	13163781.68±862090.68	4574297.12±1673512.77	5231938.51±695402.82
112	Thymine	127.05	334.639	126.043	0.325411	Nucleotides and derivatives	10260401.80±562903.71	18585864.99±4532672.58	13673585.80±237247.04	12714810.63±3696903.45
113	UMP	325.042	137.098	324.036	4.65325	Nucleotides and derivatives	107795474.67±3704942.35	28163318.36±3317526.02	15296952.24±1007854.45	16690875.85±1362452.74
114	Uracil	113.035	178.306	112.027	0.0169344	Nucleotides and derivatives	191685003.53±16065672.73	26074340.05±952393.60	53692218.22±2285778.67	77102846.86±786181.98
115	Uridine	243.062	154.614	244.07	0.436989	Nucleotides and derivatives	91313124.61±8891438.60	47702493.10±6070301.68	22007356.75±1672558.04	31368636.69±1484368.44
116	Xanthine	153.041	164.969	152.033	0.923375	Nucleotides and derivatives	79262222.15±12322128.63	43538487.95±7818689.88	107923198.60±9970132.23	94284832.95±4992000.20
117	3-O-Methylquercetin	315.05	629.983	316.058	3.62145	Flavonoids and their glycosides	11364775.96±1301130.22	12822248.65±584411.73	5274054.74±2181613.56	7598533.40±130964.09
118	Afzelin	433.11	591.854	432.106	7.71833	Flavonoids and their glycosides	9949826.04±3484311.87	11772485.12±1834094.14	26631926.96±28832822.49	19577763.77±3530775.10
119	Apigenin	270.048	676.057	270.053	16.3309	Flavonoids and their glycosides	35238147.75±8143972.31	307661388.00±270888.19	6407099.98±960621.29	15566752.02±497484.82
120	Apigenin 7-O-beta-D-glucoside	431.096	539.816	432.106	5.00988	Flavonoids and their glycosides	123603875.15±21376823.57	466481990.00±216867627.78	325982587.77±160034227.47	166851348.81±46679824.02
121	Astilbin	449.106	430.028	450.116	6.56881	Flavonoids and their glycosides	260875008.15±95843262.15	1081299316.08±65514995.68	283619741.13±70385564.94	265657169.64±12083327.34
122	Astragalin	447.092	519.416	448.101	0.489474	Flavonoids and their glycosides	2215914339.96±761964467.90	956224153.31±954970194.94	2925933757.51±1196109946.66	3271194725.78±111110438.28
123	cis-Dihydroquercetin	304.058	398.079	304.058	0.884012	Flavonoids and their glycosides	59475091.86±10664556.37	55454784.33±19852803.53	36000325.03±3459818.50	56564269.44±2551950.73
124	Delphinidin 3-glucoside	465.101	482.804	465.103	4.80322	Flavonoids and their glycosides	20717671.86±3007546.84	73074966.39±753333.43	42502800.02±3548320.19	37055624.68±2417742.71
125	Delphinidin 3-O-(6-caffeoyl-beta-D-glucoside)	608.116	496.828	627.135	0.463296	Flavonoids and their glycosides	19846855.39±2881683.75	53889952.29±9302506.17	108598910.23±7855287.37	89030727.52±9828380.98
126	Delphinidin 3-O-beta-D-sambubioside	578.113	616.405	597.146	24.819	Flavonoids and their glycosides	11270969.25±2546123.06	190895977.72±1265873.03	3903794.76±1959299.90	6250032.07±482578.11
127	Dihydromyricetin	321.06	478.835	320.053	1.76073	Flavonoids and their glycosides	150932447.22±5116712.27	228384463.08±12328421.75	365435543.64±10985015.02	233108988.51±3407728.77
128	Equol	242.284	708.483	242.094	2.7221	Flavonoids and their glycosides	75297541.18±11759524.41	95579987.04±13017537.09	57744598.36±9536206.08	74708693.89±21881283.24
129	Fisetin	286.274	750.804	286.048	2.59101	Flavonoids and their glycosides	44784199.31±31580321.79	61860252.09±47577269.72	73423485.92±39705762.76	39979887.98±18577419.62
130	Genistein	271.226	713.974	270.053	3.72403	Flavonoids and their glycosides	29083395.70±5614425.19	396730255.32±1257056.63	9251587.61±972968.12	12969389.95±3003679.32
131	Genistin	433.109	543.307	432.106	8.9476	Flavonoids and their glycosides	254286211.09±89348404.69	426491285.23±67175923.25	735114209.06±7720991.53	311649085.33±182681218.55
132	Grosvenorin	739.209	493.335	740.216	0.0288142	Flavonoids and their glycosides	30313119.51±4757220.61	52734687.73±4892762.79	43336123.46±19456987.24	16723761.74±5267669.06
133	Hyperin	465.105	516.889	464.096	4.7867	Flavonoids and their glycosides	46323568.56±1839594.33	3615224244.83±21088088.77	21255643.54±1002044.57	48895062.52±11541073.80
134	Isoquercitrin	463.086	499.687	464.096	2.82853	Flavonoids and their glycosides	3739664310.82±523202477.83	3597603922.70±752459487.69	6004723970.73±1394779173.85	5178799683.43±390271665.64
135	Isorhamnetin	315.049	697.223	316.058	3.94336	Flavonoids and their glycosides	6610591.52±1206378.14	8458474.98±57359.15	2815570.16±2076642.24	3710245.50±114782.40
136	Isorhamnetin-3-O-neohespeidoside	625.177	516.611	624.169	1.35129	Flavonoids and their glycosides	14181488.93±1278329.96	20073548.09±1199456.86	27916988.13±4167714.58	41954731.92±9654248.42
137	Isovitexin	433.117	483.731	432.106	6.18101	Flavonoids and their glycosides	95165998.05±14901539.38	12678003.97±621383.96	55816201.12±23529805.47	53953031.91±21730516.48
138	Kaempferide	301.07	691.249	300.063	2.314	Flavonoids and their glycosides	28849299.07±1368788.79	5480927.60±341214.11	2554212.95±320573.25	11161670.92±6269143.42
139	Kaempferol	287.05	648.225	286.048	18.8222	Flavonoids and their glycosides	11453911.74±8953570.95	453134880.80±6178181.60	1808650.42±1760258.34	23143464.63±22393584.27
140	Kaempferol-3-O-rutinoside	595.168	512.578	594.159	3.72264	Flavonoids and their glycosides	974195270.87±69530897.07	752172032.45±23769850.47	1203536222.08±48598405.47	1368116196.01±419725429.12
141	Lonicerin	593.149	509.395	594.158	3.71028	Flavonoids and their glycosides	952969030.52±103881727.20	332723492.25±62680071.17	841366271.78±126726199.94	1327660829.65±120653645.38
142	Luteolin	287.055	447.104	286.048	0.53743	Flavonoids and their glycosides	335363236.84±55870498.48	35683370.17±32614805.01	211322652.82±53715477.36	276119796.54±15707707.13
143	Mauritianin	741.206	599.197	740.216	23.8325	Flavonoids and their glycosides	21531008.42±1540750.06	79954612.50±2503280.14	12009052.43±2914322.76	16622249.68±3524827.37
144	Myricetin	317.029	570.283	318.038	5.41134	Flavonoids and their glycosides	251761391.04±3837114.78	82075522.23±48969262.30	79607256.41±58901184.06	75012383.47±7414989.11
145	Narcissin	623.158	513.428	624.169	5.89465	Flavonoids and their glycosides	13658288.20±3928736.39	80321811.71±3680443.15	29875066.45±4005459.54	44003685.76±1588698.90
146	Naringenin 7-O-beta-D-glucoside	435.127	544.089	434.121	4.59483	Flavonoids and their glycosides	25492296.61±5775008.50	226334359.87±61498572.78	105516700.93±65604752.24	69386834.14±42929449.08
147	Naringin	579.17	527.565	580.179	2.03756	Flavonoids and their glycosides	166311444.53±67675323.30	157266295.86±102488127.21	292123802.75±92430810.37	245730953.99±40431892.87
148	Nobiletin	403.137	770.883	402.132	4.62995	Flavonoids and their glycosides	4855592.01±1143254.09	65469352.74±1396082.30	3064441.19±1245856.04	34816270.67±17601100.40
149	Orientin	449.107	430.417	448.101	2.4788	Flavonoids and their glycosides	6054438.80±579758.94	143210311.44±53963703.33	157743681.76±10399793.34	66416877.90±6098769.56
150	Quercetin	301.036	631.291	302.043	1.83051	Flavonoids and their glycosides	596769439.36±324461836.67	90519004.54±97447108.12	176041051.28±67096573.99	133649080.84±20779268.63
151	Quercetin 3-O-[beta-D-xylosyl-(1->2)-beta-D-glucoside]	579.119	490.783	596.138	18.6849	Flavonoids and their glycosides	17481194.58±1660066.28	21912119.63±5634147.17	32087263.38±3924057.26	35559988.83±5104072.99
152	Quercetin 3-O-beta-D-glucosyl-(1->2)-beta-D-glucoside	625.141	446.412	626.148	0.341741	Flavonoids and their glycosides	5573022.27±451855.36	92412492.37±3671364.34	26566648.08±5610137.86	40873545.24±3083346.53
153	Quercitrin	447.088	551.236	448.101	10.8757	Flavonoids and their glycosides	65474365.26±42352169.48	640405325.86±93724441.78	113574528.24±51695721.98	55977137.67±29787965.46
154	Schaftoside	565.161	427.788	564.148	10.7687	Flavonoids and their glycosides	69896264.51±11221158.77	562769729.95±287631852.33	1184813100.85±206266782.56	1061617864.30±35724955.99
155	Silibinin	463.108	321.764	482.121	10.9706	Flavonoids and their glycosides	5311342.75±1348859.77	6163316.72±739669.67	5516131.66±863998.24	5159878.55±1076043.54
156	Tangeretin	373.127	795.184	372.121	2.13408	Flavonoids and their glycosides	6627774.82±385018.10	26052150.80±1634201.82	4843932.55±1946924.23	46737694.40±8330636.75
157	Taxifolin	303.05	438.72	304.058	0.90479	Flavonoids and their glycosides	3339478.33±276361.91	33359074.73±2337496.36	51729660.90±4824709.77	36525430.96±1964658.89
158	Trilobatin	436.131	520.544	436.137	12.8516	Flavonoids and their glycosides	8880686.37±3361702.07	72267201.90±6783270.26	27190500.93±4272467.94	21678269.71±600289.36
159	Vitexin	433.112	440.214	432.106	1.42145	Flavonoids and their glycosides	149319965.99±29794455.22	1253130437.29±2422213.83	281375584.47±125875707.38	212203900.22±87084381.68
160	Vitexin 2-O-rhamnoside	579.17	440.826	578.164	1.61876	Flavonoids and their glycosides	790947129.81±64664358.15	2705195970.40±380513410.14	2493266015.08±113894610.99	1721966312.10±300073580.25
161	Vitexin 4-glucoside	595.167	434.777	594.158	0.866994	Flavonoids and their glycosides	947529594.46±83579417.90	1518091120.34±316319306.72	2587894118.85±313036143.20	1979405418.18±21011978.88
162	(-)-Arctigenin	371.151	587.445	372.157	1.85666	Lignans and coumarins	4333676.49±1611820.01	15540595.80±4908787.89	9587735.79±3266177.86	6182254.51±1210146.54
163	Daphnin	340.075	389.063	340.079	11.804	Lignans and coumarins	13530347.78±1274350.92	13864426.12±881898.21	21894275.48±624662.86	20372835.11±2322857.19
164	Esculetin	179.034	500.804	178.027	0.0437053	Lignans and coumarins	211351319.70±17401946.22	28668197.84±2281633.44	5792553.63±3298243.25	11001011.65±998361.55
165	Esculin	341.086	399.84	340.079	1.10495	Lignans and coumarins	39492134.92±7238421.98	26180055.00±2775588.90	38582452.88±16241548.53	52868569.47±1718299.87
166	Methoxsalen	217.049	370.042	216.042	0.642092	Lignans and coumarins	37483571.02±2774498.84	360452.66±12110.04	88494.21±15067.32	1713055.43±1194093.73
167	Nodakenin	389.119	325.998	408.142	11.0144	Lignans and coumarins	8742489.15±1104074.50	549496.21±19013.57	577919.79±10255.41	418265.23±23889.92
168	Scopoletin	193.049	621.683	192.042	1.59916	Lignans and coumarins	18026195.87±1195655.84	8136870.40±52170.26	436550.50±68808.24	4006418.57±998290.26
169	Secoisolariciresinol	361.165	575.949	362.173	2.04239	Lignans and coumarins	20155784.41±1516659.46	42650857.59±5342906.38	17050697.04±6514570.00	17742051.75±1784360.23
170	Umbelliferone	161.024	404.427	162.032	0.29206	Lignans and coumarins	24477819.58±2543216.63	40121736.29±4913979.81	54800839.18±7626777.35	36032833.60±3567036.53
171	3,7-Dimethyluric acid	195.052	320.361	196.06	1.76064	Alkaloids	12717725.05±4641063.60	5988941.94±1763870.68	15930062.88±3720515.97	12379622.53±769924.19
172	Abrine	219.113	343.57	218.106	0.340317	Alkaloids	31513177.82±1842772.08	227583683.95±62322.66	1328328.78±95165.79	1807699.59±57476.76
173	Anabasine	144.982	837.742	162.116	3.34569	Alkaloids	148486578.64±120424946.81	314960627.88±61975305.56	879026264.25±335941391.50	585894870.24±126913194.63
174	Betaine	116.928	837.146	117.079	2.82286	Alkaloids	58261657.80±10790019.92	100461921.51±46258099.71	257277217.84±13113023.68	168521628.92±58254526.55
175	Betonicine	160.097	303.969	159.089	0.112678	Alkaloids	13866051.98±453727.02	24811701.24±402607.30	23017228.63±1767202.93	20592814.70±522038.39
176	Caffeine	194.084	177.696	194.08	19.7774	Alkaloids	16841101.09±8750396.80	54069040.93±1986567.54	20918479.26±3193234.52	92343861.77±3021208.80
177	Ecgonine methyl ester	200.128	434.762	199.121	0.739609	Alkaloids	18541858.30±7891120.42	41975917.47±14899156.40	100513092.46±6901542.20	63075203.61±3062595.96
178	Harmine	213.102	479.279	212.095	2.37539	Alkaloids	33923731.65±3435912.01	6861502.45±77621.23	513846.67±112271.49	1002860.25±416137.91
179	Indolin-2-one	134.06	441.757	133.053	0.505572	Alkaloids	62256760.80±7337666.47	74008377.46±6009969.95	28780743.16±3247401.28	81125053.96±1765200.00
180	Lycorine	287.109	306.553	287.116	22.7185	Alkaloids	95320226.54±6660861.31	384864335.76±7356998.01	146107273.72±6733084.80	237429930.88±20779082.77
181	Niacinamide	123.055	143.023	122.048	3.06053	Alkaloids	1274184718.23±163491699.50	333659378.47±108922728.94	29726036.93±5254865.06	26807777.82±2601021.01
182	Nornicotine	149.06	335.497	148.1	1.02391	Alkaloids	144451973.75±19782341.02	31928750.52±2370262.90	65073144.87±1511939.86	233632428.71±8740589.58
183	Securinine	217.104	351.592	217.11	28.3729	Alkaloids	27663406.01±1103236.72	94745635.32±2320133.24	24335318.66±4673020.72	29158955.89±3443040.87
184	Stachydrine	144.102	97.8168	143.095	1.70346	Alkaloids	179860843.71±2957297.44	104467425.94±3175213.63	157482536.37±732500.70	171602293.26±3141212.65
185	Theobromine	181.073	769.611	180.065	3.92519	Alkaloids	39991813.15±7107826.73	325967029.50±42734344.34	63615649.75±39814074.14	41864845.61±27096049.19
186	Theophylline	181.072	389.433	180.065	0.122837	Alkaloids	467871819.43±46666905.05	310290774.48±13549469.35	479121180.84±241176222.48	522864923.41±11491405.04
187	Trigonelline	138.055	327.948	137.048	0.645438	Alkaloids	3608079.40±281009.09	12302418.94±14401799.62	9263842.78±5976450.43	36013341.41±697240.29
188	1-O-Galloyl-beta-D-glucose	331.065	127.822	332.074	5.12676	Sugars	34818265.91±11933344.39	127903287.96±2206681.70	3494230.76±185528.07	14868659.18±2806245.39
189	1-O,6-O-Digalloyl-beta-D-glucose	483.081	379.773	484.085	7.17957	Sugars	7746457.09±1406201.63	169649460.68±199958372.37	114033862.86±20588025.50	48871572.39±21905215.41
190	3-Keto-b-D-galactose	159.03	93.8838	178.048	2.26609	Sugars	111753475.49±11912818.31	49788838.36±13941215.00	92133978.79±7761849.25	86949322.85±10024505.17
191	3-Ketolactose	339.092	161.238	340.101	4.68571	Sugars	6578164.92±789428.65	16786418.47±528715.87	11917546.52±1674058.84	17989351.73±1341015.81
192	6-Acetyl-D-glucose	221.066	467.913	222.074	1.32919	Sugars	3421846.01±220867.64	11422246.47±706147.96	22465907.46±2093411.55	17264178.12±199306.69
193	Acetyl-maltose	383.119	201.443	384.127	2.25447	Sugars	12531481.98±1980612.49	54081207.79±78025.11	520106.50±173927.56	509568.45±302449.79
194	Alpha-D-Glucose	179.056	441.095	180.063	0.111767	Sugars	71042419.31±23046252.41	59879419.96±2104032.85	62457444.10±14794353.57	71081073.32±24943400.58
195	Arbutin	271.082	221.718	272.09	0.420694	Sugars	8346882.85±457106.67	36098335.71±1028280.82	10782916.34±1630600.71	9566385.86±788682.01
196	Cellobiose	343.124	96.3912	342.116	1.51465	Sugars	94123267.52±28557920.41	252138357.19±10063241.96	69190904.36±7423409.87	78845671.77±23160812.29
197	D-(+)-Maltose monohydrate	360.15	95.8282	360.127	0.594269	Sugars	259340506.81±6288450.23	239976718.17±151645868.13	372116592.78±133404845.11	210448333.18±6896769.56
198	D-Fructose	161.046	152.427	180.063	7.00926	Sugars	332403048.95±51835253.45	79282642.98±1292584.15	26968299.72±515857.57	25557610.39±271090.70
199	D-Galactose	161.044	75.0689	180.063	7.63713	Sugars	107862644.28±2053694.23	97994407.10±1318670.57	126589168.60±4361944.21	120052568.86±2916160.08
200	D-Glucose 1-phosphate	261.036	88.8538	260.03	2.0014	Sugars	38700392.17±1302222.37	46278714.23±4625431.84	55196973.47±7860864.55	53179461.64±2024525.03
201	D-Lyxose	150.077	149.04	150.053	0.0935673	Sugars	8363839.42±949167.61	3428206732.89±324055.02	17313260.32±1521977.77	20002166.06±940409.14
202	D-Mannose	179.055	88.976	180.063	0.981742	Sugars	2537120194.85±230119060.05	3537070729.21±309695659.30	4919185464.96±90372416.78	4607006736.09±59809089.58
203	D-Ribose	151.039	360.26	150.053	29.8201	Sugars	147061360.45±45107558.12	136494938.58±11722828.76	232358994.13±27616912.83	142930256.09±37946092.80
204	D-Ribose 5-phosphate	230.248	746.653	230.019	0.683444	Sugars	21250684.20±14388291.05	21087718.23±781991.20	31636412.22±24094200.97	29208685.83±6827569.98
205	D-Ribulose 5-phosphate	229.012	75.4738	230.019	1.44765	Sugars	5471110.70±58361.04	14327546.34±262698.03	7260075.72±445561.14	7613801.30±565968.00
206	D-Sorbose	161.045	437.548	180.063	1.90861	Sugars	64558416.58±22167498.13	358994918.10±17071914.16	38627323.59±636574.11	46703837.14±1075764.53
207	D-Xylose	149.045	89.6405	150.053	1.29171	Sugars	92467258.09±13281004.76	419649773.53±23982002.25	430948105.65±92361900.53	305763892.84±3172316.12
208	Fructose 1,6-bisphosphate	340.258	453.688	339.996	4.71534	Sugars	225744377.49±10439767.33	77306118.90±5347181.73	108305064.31±4919424.66	248836598.66±8294853.40
209	Geniposide	387.128	313.43	388.137	3.29813	Sugars	4670388.26±567233.81	68279903.41±1020144.75	12695779.14±1933438.09	6279700.91±793616.79
210	Gluconolactone	177.04	96.346	178.048	0.809239	Sugars	156250968.68±18250690.21	76867139.63±20006163.89	71157594.12±283695.90	56326814.26±7153418.94
211	Glucosamine	180.088	352.569	179.079	5.35124	Sugars	17256970.06±2407468.92	23881834.39±4325597.54	23930650.55±1346126.80	28869123.13±2724664.64
212	L-Iditol	181.069	685.352	182.079	13.9353	Sugars	26874340.09±8945767.71	64750442.23±19081300.80	18662484.57±16167509.82	15419929.47±7987467.99
213	Malvidin 3-glucoside	492.141	459.951	493.135	28.2192	Sugars	46535041.27±5131144.14	55601163.60±8312461.57	61332689.21±20550905.25	36740436.24±12049424.42
214	Manninotriose	485.148	98.3978	504.169	4.78765	Sugars	73925558.29±9502578.07	17983672.64±281319.27	1671309.00±210692.27	7508154.60±340377.08
215	Mannitol	181.073	391.197	182.079	4.45317	Sugars	35060511.23±6532328.53	141604738.89±4926908.95	33244710.71±7955267.88	28221770.09±4755910.50
216	Melibiose	341.108	83.0384	342.116	0.121188	Sugars	136367933.62±16924664.82	194411158.72±31168687.30	281084085.80±17957353.91	209492212.62±90952091.97
217	N-Acetyl-D-galactosamine	204.086	128.065	221.09	18.7235	Sugars	56914084.39±26476387.95	98977778.62±7799176.47	74626334.16±27746157.35	108486745.93±8080021.08
218	N-Acetyl-D-glucosamine	222.097	95.2764	221.09	0.641722	Sugars	65638508.68±7506767.75	55424657.58±3213963.58	57237859.63±1164927.00	79130849.01±787214.63
219	Raffinose	503.166	98.4454	504.169	9.15619	Sugars	111092987.79±27577415.99	29494513.16±20513821.47	75932900.25±30342556.10	94367480.73±12825338.58
220	Sucrose	342.118	165.512	342.116	4.80033	Sugars	41280660.26±10246087.77	16518477.98±36854.21	4702173.32±48222.35	3964055.22±128530.92
221	Trehalose	342.137	96.4018	342.116	0.114629	Sugars	42385442.65±12608232.47	16414251.06±23222017.35	51682114.61±6066878.52	32633830.71±24627698.30
222	(-)-Jasmonic acid	211.133	504.051	210.126	0.895112	Organic acids	111213493.72±20667318.66	26893610.86±855340.82	9198055.07±663309.24	107512395.60±7021417.30
223	2-Furoate	111.009	74.0524	112.016	0.166375	Organic acids	50090647.07±2433985.19	77091131.51±1077546.86	46524219.36±3735527.29	48018133.64±1275453.91
224	2-Isopropylmalic acid	176.064	104.94	176.069	23.7732	Organic acids	2879680.79±919196.61	55449072.22±75182294.14	120261507.52±3998713.87	107091756.35±3176202.16
225	2-Methylglutaric acid	145.05	77.5212	146.141	7.83975	Organic acids	15681686.50±8740399.71	48480720.56±696208.00	8095730.81±2323342.87	25892713.88±1358473.22
226	3-Methoxycinnamic acid	161.06	522.907	178.063	26.3533	Organic acids	59800962.68±21344279.57	54735779.76±3093097.08	93013507.36±3332346.11	86322895.79±17393335.10
227	3-Methyl-2-oxovaleric acid	113.06	353.7	130.063	6.32761	Organic acids	26643423.90±13602720.38	32689133.83±463569.94	25517881.10±1076532.70	33248663.01±15327559.56
228	6-Aminohexanoate	132.102	290.959	131.095	0.170979	Organic acids	1857655350.60±222047145.08	31548323.41±2500800.03	65739214.09±9340850.63	1661452203.17±39123316.84
229	6-Hydroxynicotinic acid	138.02	615.133	139.027	0.273991	Organic acids	31380715.25±3179892.06	19471590.34±3832711.70	16987957.77±5488022.41	21168168.31±691644.75
230	Acetoacetic acid	103.039	137.061	102.032	0.470189	Organic acids	21911016.04±2265444.40	76222070.89±2756815.75	16396510.99±739486.90	14471517.57±373842.99
231	all-trans-Retinoic acid	300.198	442.139	300.209	0.347603	Organic acids	193133839.40±124464720.17	69452182.83±45185417.17	188668945.09±52678259.65	116905780.20±45258086.37
232	Azelaic acid	187.025	330.565	188.105	3.088	Organic acids	43613.09±11843.03	107069472.79±725884.57	8730954.26±1121642.49	3750328.48±435727.59
233	Benzoic acid	123.045	455.514	122.037	4.45475	Organic acids	160865203.03±37236061.89	246257687.80±34906232.46	180924566.81±5841678.52	198730624.04±31513039.25
234	Citramalic acid	129.019	115.076	148.037	2.89464	Organic acids	47502712.01±43438318.94	278247859.82±3612227.16	260326503.06±25925725.34	155711725.42±3227818.60
235	Citric acid	191.019	71.7241	192.027	0.476798	Organic acids	266968079.32±163057245.29	144168219.96±47528306.34	188398746.53±23313691.32	135177396.58±1055027.31
236	D-Phenyllactic acid	167.07	361.524	166.063	1.46225	Organic acids	19840833.19±2762068.42	17407947.52±3767084.59	25633489.69±4239294.20	44744876.85±1058693.79
237	Dehydroascorbate	173.009	160.823	174.016	0.348925	Organic acids	6431864.94±764147.75	13640368.58±718048.70	12520074.08±4302825.01	8025754.65±763119.33
238	DL-Isocitric acid	239.059	755.693	257.973	0.0370716	Organic acids	14180459.19±2138145.02	6424930588.27±2945862.08	10853705.80±4204620.39	11797246.87±1449614.11
239	gamma-Aminobutyric acid	104.107	83.3091	103.063	3.98512	Organic acids	9323263472.91±365473756.28	6441016178.86±280462028.81	10702916232.59±335485407.06	11794810799.28±156392907.80
240	Gentisic acid	153.018	378.696	154.027	8.176	Organic acids	94171274.59±78010760.75	23325292.54±8173475.69	32884479.73±1062395.45	32765623.79±5552530.58
241	Glutaric acid	131.071	147.381	132.042	5.10845	Organic acids	1567730.91±327186.95	2848410.22±471297.88	1317194.54±174604.96	11468856.42±413686.38
242	Homovanillic acid	183.065	536.709	182.058	0.0304618	Organic acids	27209366.27±4417566.33	333543793.55±3003537.93	9961943.66±5908625.96	15001777.96±4897993.21
243	Isocitrate	173.009	114.843	192.027	3.04637	Organic acids	18026765.04±2176757.20	332078602.45±29214550.31	617536454.22±44553189.43	339298274.48±3110035.68
244	Isovaleric acid	102.091	345.817	102.068	1.43007	Organic acids	33219452.86±3257197.44	2382996.28±100448.30	1384059.33±54006.50	1429314.07±39398.75
245	Mandelic acid	153.056	176.099	152.047	9.43853	Organic acids	33053407.24±3287394.26	15235400.57±1318836.14	4034469.66±2532992.18	6142516.95±2992766.35
246	Maslinic acid	455.355	724.374	472.355	16.2984	Organic acids	20911206.84±9071334.30	43020311.54±2907494.76	23870645.00±4460427.30	59536488.59±24302868.97
247	Methylmalonic acid	116.927	793.128	118.027	0.0755968	Organic acids	37534853.51±8010882.26	36732893.48±22186812.57	58410084.15±24470736.34	108298430.32±69031644.84
248	Oleanolic acid	439.357	674.057	456.36	10.209	Organic acids	8909030.24±1012169.75	9026044.95±1821363.73	9517441.55±2579169.79	13640788.95±5672349.94
249	p-Anisic acid	151.041	686.958	152.047	8.24905	Organic acids	1470761.46±221637.56	14768792.19±2675771.17	4216014.84±3306292.41	14244340.06±4784199.03
250	Quinolinic acid	167.011	704.699	167.022	9.28225	Organic acids	42891807.77±22055493.40	294278162.75±8755398.54	49299607.90±28899552.47	39332842.43±32357996.23
251	Succinic acid	117.019	74.7053	118.027	3.14372	Organic acids	1915763111.88±227456124.63	311318063.77±18408479.50	636464638.47±21104496.30	1485149484.60±30168288.96
252	trans-Cinnamate	146.966	57.8963	148.052	4.02748	Organic acids	55669350.04±420275.51	66647977.90±4259786.83	63218451.25±2420901.98	73720362.22±2169500.35
253	Undecanoic acid	186.955	58.1243	186.162	6.97958	Organic acids	74226661.94±5530313.27	39057348.99±11164947.94	62196021.95±5873704.31	65181931.96±3491991.44
254	10-Hydroxydecanoic acid	171.138	786.832	188.141	24.6023	Lipids	24291025.21±1480841.04	3146088.43±1266741.13	4122183.00±544298.99	49012753.19±8740195.21
255	13-L-Hydroperoxylinoleic acid	313.237	764.851	312.23	2.13736	Lipids	18368416.49±5263625.16	3092833.04±667072.32	1027790.23±994932.10	2860314.81±2560737.58
256	13S-hydroxyoctadecadienoic acid	295.227	817.482	296.235	2.42894	Lipids	52528919.31±17356286.60	32685718.61±953475.09	2864289.74±908441.42	6707654.30±6467868.71
257	3-Hydroxyphenylacetate	151.04	431.213	152.047	1.20476	Lipids	25857401.54±2913986.05	35637150.09±6975084.89	37473749.91±988691.86	29759546.97±1348608.92
258	8,11,14-Eicosatrienoic acid	303.08	647.077	320.09	7.54003	Lipids	9933491.29±2966156.22	8265342.39±2095602.29	14600987.04±1947300.29	14395785.29±980992.57
259	9,10-Dihydroxy-12,13-epoxyoctadecanoate	306.242	800.893	306.256	28.1459	Lipids	63464058.73±9868805.19	33116076.17±1338774.90	7421349.43±1942012.70	42430038.42±2399351.69
260	9,10-Epoxyoctadecenoic acid	329.233	623.123	330.241	2.33344	Lipids	957599789.75±144364738.16	52595477.80±13239577.75	77895256.79±10960474.88	459381460.76±74539538.61
261	Alpha-Linolenic acid	295.228	836.655	296.235	0.108429	Lipids	100626443.60±9968666.11	42913130.40±3431231.04	58551457.08±10298755.07	37088582.54±3103482.17
262	Arachidic acid	261.221	829.871	278.225	13.6125	Lipids	21994037.16±4057406.04	27523661.96±8711935.71	15251138.22±13938826.52	46738037.20±27621342.58
263	Arachidonate	312.325	838.522	312.303	1.63746	Lipids	5786645.05±1099387.55	12037856.58±638594.60	12295078.86±4548042.26	14814711.74±1166692.59
264	Capric acid	305.246	600.64	304.24	3.29811	Lipids	19133770.47±221825.70	62291327.47±2528819.75	8418015.20±1247319.03	8900081.69±1262108.19
265	cis-Aconitic acid	171.139	807.626	172.146	1.20819	Lipids	122359217.24±5266216.00	138193355.63±52550682.06	165896997.61±8078345.04	237670738.37±4054512.22
266	Citraconic acid	173.009	73.5432	174.016	0.0851269	Lipids	4761431.80±258186.61	81861481.64±58380366.37	177260786.79±29850446.82	69992017.60±12266088.56
267	Dibutyl phthalate	131.034	189.419	130.027	0.301381	Lipids	1528941.44±1153140.81	3808939.55±664868.48	5336795.47±507208.93	2637612.60±1231181.39
268	Docosahexaenoic acid	277.144	710.366	278.152	3.02283	Lipids	20834375.40±7309269.52	2993805.36±1294160.41	7826263.34±2431023.29	26005344.77±4857340.81
269	Dodecanedioic acid	328.247	765.765	328.24	20.7062	Lipids	7244283.19±926278.78	5280775.88±14199.92	3656776.76±1555753.52	9662683.12±2918969.73
270	Dodecanoic acid	211.134	571.396	230.152	3.96363	Lipids	7840495.22±951166.38	81083222.88±3318456.07	17328444.94±8034299.68	17816883.33±4227343.59
271	Erucic acid	199.975	62.9081	200.178	9.40468e-05	Lipids	72192230.85±29887048.49	76819366.02±60518033.63	127921698.91±140636297.12	248830027.01±53134694.82
272	Ethyl caffeate	338.345	838.316	338.318	12.1863	Lipids	2789271.84±886373.35	1848614.91±1092495.40	2186868.48±245087.38	7296132.10±258343.30
273	Ethyl gallate	207.07	328.9	208.074	15.8828	Lipids	40625699.90±6055999.52	33489542.42±753336.35	3119487.98±611906.49	43356315.55±7641603.73
274	Gamma-Linolenic acid	197.046	228.16	198.053	0.0905277	Lipids	75403868.19±4502063.30	36528780.56±16564042.83	51523698.00±14506442.38	58007733.04±13171195.86
275	Hexadecanedioate	279.232	783.889	278.225	0.736371	Lipids	10971938.47±851007.44	7039976.45±1255671.44	4011297.61±1061041.61	6856332.41±1636797.76
276	Linoleic acid	285.206	773.802	286.214	3.71609	Lipids	27294704.85±1764620.89	29684271.10±5368813.65	2336330.15±291129.68	10396247.60±4632268.68
277	LysoPA(16:0/0:0)	263.236	824.274	280.24	14.1011	Lipids	285195467.82±22951644.52	42016161.90±14214576.56	38996004.02±9783694.92	195922843.13±26781548.29
278	LysoPC(18:0)	409.236	809.74	410.243	0.897929	Lipids	41038103.35±27580780.80	19729348.75±28205366.16	21302418.75±15997002.82	62430636.10±29389357.08
279	Methyl jasmonate	524.37	819.024	523.683	1.833	Lipids	35487690.44±10810180.25	18770907.62±1336172.95	11775763.52±1985017.00	65589539.45±7101264.70
280	Myristic acid	225.148	790.648	224.141	1.16768	Lipids	24704161.85±4248950.83	137076504.06±8545384.09	26035644.50±7763811.48	29632429.86±2765771.82
281	N-Glucosylnicotinate	229.18	741.319	228.209	1.52232	Lipids	127548886.43±8663278.56	355066568.40±6065277.79	238829953.76±31637740.08	223080836.15±8139433.95
282	Octadecanamide	286.09	95.2496	286.093	9.59244	Lipids	342077426.91±158272105.99	312950773.00±152045743.06	481328324.98±338392081.77	808294695.16±111959816.65
283	Oleic acid	284.295	786.487	283.288	0.95419	Lipids	201664637.85±60651298.40	96057377.79±82469773.71	275420752.13±196557153.79	220403774.63±114718684.81
284	Palmitic acid	282.279	827.424	282.256	0.738109	Lipids	22672907.99±690134.91	24119948.76±15183642.38	23345484.76±15437439.22	32988178.65±1786640.14
285	Pelargonic acid	256.263	816.219	256.24	2.47296	Lipids	35236204.82±893873.27	20339896.52±868974.89	15283323.50±2986075.11	15552992.70±388262.09
286	Pentadecanoic acid	157.123	762.452	158.131	1.32313	Lipids	22812544.52±5649847.22	177155932.13±20183645.34	9723408.57±1203885.70	12472962.72±3041902.97
287	Phenyl acetate	241.218	793.756	242.225	1.38366	Lipids	836105857.74±223764539.27	165579523.25±85119591.67	221068277.81±83959668.44	418799752.62±323060031.21
288	Sebacic acid	134.894	810.027	136.052	7.84742	Lipids	29028680.80±2986550.72	30362721.43±102500.24	360015.21±59387.02	24845490.09±2390257.16
289	Sphinganine	185.117	504.974	202.12	22.2354	Lipids	111430439.87±44303449.64	31043895.55±38771386.82	95896469.03±12124024.22	128341689.22±15447469.89
290	Stearidonic acid	302.305	759.66	301.298	0.0207571	Lipids	62818974.95±6517550.61	6677232.69±403439.54	2955192.86±566226.30	24399463.95±5833718.17
291	Suberic acid	275.201	806.316	276.209	1.70901	Lipids	20785364.13±2047291.97	7514237.65±4770948.24	23713882.42±19381329.16	84508811.87±46340888.95
292	Tetracosanoic acid	173.082	185.847	174.089	1.59134	Lipids	18634046.53±20940590.93	8063940.12±4609075.42	6989258.61±7042802.35	21277558.06±15076806.74
293	4-Coumaroylshikimate	367.355	801.407	368.365	7.17137	Lipids	7796999.06±3710411.61	400974867.43±2150971.85	5609509.11±3360342.52	5504137.17±617491.48
294	(S)-Piperidine-2-carboxamide	129.102	140.296	128.095	2.27998	Others	424514653.80±74864077.00	409695113.88±18844457.86	714521331.33±7171746.89	702451639.62±27711287.92
295	3-Hydroxymethylglutaric acid	145.048	306.298	162.053	19.395	Others	557369541.84±89658459.84	19186130.97±24958197.41	72019069.96±44973802.59	183185186.72±67380510.24
296	4-Pyridoxic acid	182.046	336.339	183.053	0.0275138	Others	13967583.29±1391167.35	8567146.02±71453.56	7526235.35±532489.27	8263165.05±132805.78
297	4-Quinolinecarboxylic acid	172.956	64.2704	173.048	10.0327	Others	9340926.64±1169700.72	33653639.33±314151.66	10413665.43±1372304.03	10917499.68±978071.48
298	4,5-Dihydroorotic acid	158.154	758.668	158.033	2.10149	Others	45824060.77±11334716.44	29225478.25±11668349.84	51914681.87±10535174.30	59060288.84±11563895.13
299	5-Hydroxyindoleacetic acid	192.065	390.828	191.058	0.734308	Others	36329502.47±2085068.30	6138120.14±13392.33	25325.19±11190.32	28596.08±10157.79
300	5-O-Methylvisammioside	452.174	520.082	452.168	12.7516	Others	684534.38±309641.66	322894131.89±7988883.66	6756320.53±2990900.00	7226810.45±3472759.46
301	Catechol	111.019	780.933	110.037	11.8035	Others	387683519.85±101925509.11	387717016.69±233864823.65	579971904.40±499359453.13	1374592468.73±995743939.34
302	Cynarine	515.124	445.413	516.127	9.09263	Others	25858777.93±5880076.81	122633888.73±31285034.63	91362938.62±26458979.52	47684674.78±4637889.33
303	Epsilon-caprolactam	114.091	417.834	113.084	0.557849	Others	212066366.11±70648347.12	57129518.96±4588951.02	86730333.14±11878724.93	114691796.95±7163144.96
304	Eriodictyol	289.071	626.458	288.063	0.457987	Others	149292432.00±35519493.32	234233022.32±196828.14	57866732.24±24491641.07	42312792.04±13308049.40
305	Pipecolic acid	130.05	157.059	129.079	17.9531	Others	6177661090.64±1582987564.30	250515359.23±92032703.48	359960455.97±81990980.13	483230732.13±77257238.41
306	Thymol	151.112	752.968	150.105	1.02364	Others	455559108.89±22875829.01	43449841.75±7662199.51	30674845.57±2502278.50	959771216.21±136440062.86

## Sheet: Table S2
Table S2. The information on 159 differential non-volatile metabolites
No.	Name	FTL	WTL	ZTL	DTL
1	3-Amino-4-hydroxybenzoate	5950552.49±941784.48	6606973.88±1153119.04	6206672.22±189490.83	40488728.67±4145883.59
2	5-Hydroxy-L-tryptophan	31362827.39±5325249.99	33300496.72±4370071.17	17503043.23±1914057.89	1778753.13±139832.68
3	Carglumic acid	4564191.57±41181.83	4047019.03±235052.19	3530217.69±81304.22	691637.04±122008.91
4	Dimethylglycine	43228889.63±1224019.80	32494684.80±948035.01	19359044.60±228801.14	9416776.60±1284906.73
5	Hydroxyisoleucine	91132396.22±6794237.33	61521676.36±3881991.67	62058405.43±202833.13	136145563.73±6476238.18
6	L-Arginine	252488171.83±14139153.03	96938964.16±9587348.67	156139588.53±17900187.41	98321473.72±18516307.13
7	L-Glutamic acid	34782782.60±22712832.27	29959034.77±19965217.11	51614478.67±25594922.69	121286028.87±16556495.72
8	L-Glutamine	2074524295.00±248654287.03	1636501189.33±119928425.39	2721273084.33±67976632.12	664313283.00±26142377.90
9	L-Histidine	2635676.77±109277.32	2666648.14±85538.93	2798296.80±144599.72	71385527.42±8201348.35
10	L-Isoleucine	2426421210.00±10872423.68	4030162721.33±62934612.26	7642652829.67±183656549.14	3591422651.67±483616539.75
11	L-Leucine	1869253020.00±49026284.52	4602090476.67±110077007.51	7448199420.67±31938783.39	3320950224.67±475084492.64
12	L-Lysine	10969643.21±338502.45	15430415.66±514533.15	37384338.11±1508262.41	27422446.19±2543561.12
13	L-Lysine 1,6-lactam	533958059.97±47513465.72	529424863.13±23288221.12	534213568.50±117539624.50	255425177.63±33130342.08
14	L-lysine hydrochloride	3795826.30±289864.39	3641579.19±454664.32	61172180.49±4463443.26	56720731.02±7598757.24
15	L-Methionine	46196256.47±17186563.52	54745074.04±14756199.14	117496632.60±15309431.12	4725238.81±1243127.72
16	L-Methionine S-oxide	32426259.99±3241316.25	39038343.26±3048467.46	72676723.99±7207645.05	35567275.94±3137802.00
17	L-Phenylalanine	2485731173.33±34204255.22	5193165281.67±144584953.45	19726698162.00±384910073.25	12218448471.33±1552208193.45
18	L-Tryptophan	2915608300.67±107256984.38	3616919018.33±43462641.70	10445973927.67±178539075.58	4623359299.33±601881886.05
19	L-Tyrosine	1441481127.00±16551169.54	2963077215.33±125617399.33	7199797600.33±72462855.71	3471836089.67±532129462.68
20	L-Valine	23111518.21±1475258.47	42109382.29±2595308.99	124622525.47±3890920.44	73718848.28±11925496.28
21	N-Acetyl-L-phenylalanine	7783916.69±5179313.54	9655213.43±334335.98	11663689.85±169575.17	557942.67±90953.28
22	N-Acetylleucine	1205404.53±40909.51	2659896.17±160473.24	7351608.61±355761.59	10995158.69±1571929.08
23	N-Alpha-acetyllysine	4017858887.00±167063893.25	5075690826.00±71014314.31	14208775121.00±134866505.14	6335749663.00±846480887.99
24	N-methyl-L-glutamic Acid	2704965.31±37511.81	2269653.68±123865.15	1911159.55±39758.80	76455203.98±13715639.14
25	Pyroglutamic acid	224318014.40±53758327.20	121408368.57±21694847.19	160041854.90±8209998.37	1710185783.33±324935083.61
26	Tryptamine	3722079.85±94534.21	4667108.32±517824.54	2964346.33±2098414.25	35672635.86±5984603.30
27	Tryptophanol	45393867.62±2542764.84	57079882.38±724592.55	156152383.90±2438872.90	72752902.67±9612066.85
28	Tyramine	59505976.17±1728735.42	61074223.39±3290517.07	63175227.24±2454160.67	26788523.13±9580945.09
29	Vigabatrin	15060014.92±300554.07	13702061.52±137482.71	47105914.60±45814901.50	2731972137.33±211156834.31
30	2-Hydroxy-3-(4-hydroxyphenyl)propanoic acid	1030139.43±231292.46	1160168.23±238461.13	1256048.49±332444.17	29985167.53±4536371.48
31	3-Hydroxybenzoic acid	23205904.13±4703507.30	16781290.34±2815498.27	25047560.57±7174668.65	4115517.45±258627.33
32	4-Hydroxycinnamic acid	91893034.00±12200839.83	101958003.55±5632691.49	99352449.50±11475483.35	367229103.67±39141318.46
33	Chlorogenic acid	520274129.83±26948431.48	379759887.87±61158937.49	178499311.63±15851078.51	154004311.17±19007167.54
34	Dattelic acid	13229469.56±419178.85	36550278.16±3081422.69	9016380.98±3686979.74	7905001.44±3531399.32
35	Isochlorogenic acid b	117920210.33±4594092.49	76810089.10±5140548.90	27331030.55±12721279.40	24985886.99±4385358.24
36	Methyl ferulate	54427989.51±1188473.17	49042223.35±2988513.48	44480504.27±1607943.75	5506487.76±474883.79
37	Methyl gallate	1981415728.33±108680906.49	1888152346.67±117289461.55	1703202501.67±101861006.47	669184416.13±81334531.15
38	p-Hydroxyphenylacetic acid	1892871.16±152477.18	1689219.86±106813.38	2149528.62±52714.31	27910574.83±5703766.43
39	Protocatechuic acid	77266999.71±6866762.58	75620773.87±4844623.81	62928877.67±868106.09	656405316.37±64531219.62
40	Vanillate	11812305.10±8458130.34	35625861.74±22825442.63	38268087.44±15768547.54	20885095.02±5381901.56
41	2-O-Methyladenosine	16873594.46±1046203.61	15553520.20±539157.24	34467432.86±1371747.73	33043253.57±1838552.79
42	3-AMP	11300303.83±6681503.21	17887733.84±7211708.99	18261871.40±8122665.95	67974370.88±8927705.37
43	5-Deoxyadenosine	2089503.42±1469403.81	2672901.20±1141664.15	1572977.60±841729.58	72580987.49±2064836.47
44	5-Methylthioadenosine	585385.52±49158.70	3724462.70±3455654.48	7347499.35±758503.71	40287447.67±12808248.22
45	6-Methylmercaptopurine	25161654.04±6532882.52	21623800.41±3394037.80	24137121.13±3636741.97	62109560.65±5006338.18
46	Adenine	35906018.02±3775170.43	40572900.30±2879733.50	110462201.67±2777243.56	271295600.07±27587733.69
47	Adenosine	78012392.11±11832061.90	78481773.43±4865073.69	113177128.37±6926468.77	6329964424.00±517911868.43
48	Cyclic AMP	8938.66±6788.05	34940.69±6103.89	2734254.76±92730.61	72248770.75±9040971.70
49	Cytidine	2345786.80±63631.30	2661164.74±565396.05	6226910.29±143736.63	15500802.82±1352883.92
50	Deoxycytidine	53631069.78±25848616.91	63117703.80±27453471.24	102358186.74±5111581.06	42636549.72±4485715.22
51	Dihydrouracil	181850529.87±9988714.63	99016707.98±51882328.57	87529249.50±28411391.02	25234407.89±3256587.66
52	GMP	3182820.75±250861.86	3947855.22±288903.47	2474346.37±140062.69	135654579.30±12007004.05
53	Guanine	43194877.71±2474415.87	46941467.36±5182945.80	80171046.88±5754191.24	236027832.80±27009046.21
54	Guanosine	54543892.67±2034237.84	63365591.42±3332743.73	116374258.60±3436097.84	320314288.53±32648725.72
55	Guanosine 2,3-cyclic phosphate	2258287.12±227594.81	3892847.18±1841821.26	1365516.42±62293.51	82099271.95±36272039.58
56	Hypoxanthine	34426942.60±3667892.61	26829722.36±2577281.32	55862820.68±13970151.37	42606080.37±3703542.02
57	Inosine	6826288.50±497856.08	4238803.64±88714.56	10818104.18±860977.51	11536325.14±1933650.32
58	Riboflavin	450965.88±163937.25	519440.54±47147.80	1098853.14±178320.23	33746060.60±1104326.89
59	UMP	16717225.67±3317526.02	15296952.24±1007854.45	16690875.85±1362452.74	107795474.67±3704942.35
60	Uracil	39609411.05±952393.60	53692218.22±2285778.67	77102846.86±786181.98	191685003.53±16065672.72
61	Uridine	12539269.05±6070301.68	22007356.75±1672558.04	31368636.69±1484368.44	91313124.62±8891438.62
62	Apigenin	2111731.69±270888.19	6407099.98±960621.29	15566752.02±497484.82	35238147.75±8143972.31
63	Delphinidin 3-O-(6-caffeoyl-beta-D-glucoside)	104842974.28±9302506.18	108598910.20±7855287.37	89030727.54±9828381.01	19846855.39±2881683.75
64	Genistein	10474431.14±1257056.63	9251587.61±972968.12	12969389.95±3003679.33	29083395.70±5614425.19
65	Genistin	782986079.50±67175923.29	735114209.07±7720991.53	311649085.33±182681218.55	254286211.10±89348404.69
66	Hyperin	35472884.50±21088088.77	21255643.54±1002044.57	48895062.52±11541073.80	46323568.56±1839594.34
67	Isorhamnetin	232240.23±57359.15	2815570.16±2076642.24	3710245.50±114782.40	6610591.52±1206378.14
68	Isorhamnetin-3-O-neohespeidoside	16684709.72±1199456.86	27916988.13±4167714.58	41954731.92±9654248.42	14181488.93±1278329.96
69	Isovitexin	23462386.47±621383.96	55816201.12±23529805.47	53953031.91±21730516.48	95165998.05±14901539.38
70	Kaempferide	1893621.48±341214.11	2554212.95±320573.25	11161670.92±6269143.42	28849299.07±1368788.79
71	Luteolin	58304447.48±32614805.01	211322652.83±53715477.38	276119796.57±15707707.11	335363236.83±55870498.46
72	Myricetin	146846932.11±48969262.28	79607256.40±58901184.05	75012383.47±7414989.11	251761391.07±3837114.80
73	Narcissin	17304112.33±3680443.15	29875066.45±4005459.54	44003685.76±1588698.90	13658288.20±3928736.39
74	Nobiletin	5203383.07±1396082.30	3064441.20±1245856.04	34816270.67±17601100.40	4855592.01±1143254.09
75	Orientin	125735322.42±53963703.34	157743681.73±10399793.32	66416877.90±6098769.56	6054438.80±579758.94
76	Quercetin 3-O-[beta-D-xylosyl-(1->2)-beta-D-glucoside]	20352708.60±5634147.17	32087263.38±3924057.27	35559988.83±5104072.99	17481194.58±1660066.28
77	Quercetin 3-O-beta-D-glucosyl-(1->2)-beta-D-glucoside	23471530.64±3671364.34	26566648.08±5610137.86	40873545.24±3083346.52	5573022.27±451855.36
78	Schaftoside	1119457197.53±287631852.17	1184813100.80±206266782.56	1061617864.33±35724955.99	69896264.51±11221158.77
79	Tangeretin	6244371.16±1634201.82	4843932.55±1946924.23	46737694.40±8330636.74	6627774.82±385018.10
80	Taxifolin	45859930.44±2337496.36	51729660.90±4824709.77	36525430.96±1964658.90	3339478.33±276361.91
81	Trilobatin	20858219.02±6783270.26	27190500.93±4272467.94	21678269.72±600289.36	8880686.37±3361702.07
82	Vitexin	123676184.77±2422213.82	281375584.47±125875707.38	212203900.22±87084381.68	149319966.00±29794455.23
83	Vitexin 2-O-rhamnoside	2382584690.00±380513410.09	2493266015.00±113894610.89	1721966312.00±300073580.19	790947129.83±64664358.18
84	Vitexin 4-glucoside	3027807251.00±316319306.83	2587894119.00±313036143.23	1979405418.33±21011978.79	947529594.60±83579418.08
85	1-O-Galloyl-beta-D-glucose	4994138.86±2206681.70	3494230.76±185528.07	14868659.18±2806245.39	34818265.91±11933344.39
86	1-O,6-O-Digalloyl-beta-D-glucose	250812437.06±199958372.37	114033862.86±20588025.49	48871572.39±21905215.41	7746457.09±1406201.63
87	3-Ketolactose	11091192.43±528715.87	11917546.52±1674058.84	17989351.73±1341015.81	6578164.92±789428.65
88	6-Acetyl-D-glucose	22481644.51±706147.95	22465907.46±2093411.55	17264178.12±199306.69	3421846.01±220867.64
89	Acetyl-maltose	362848.43±78025.11	520106.50±173927.56	509568.45±302449.79	12531481.98±1980612.49
90	D-Fructose	35914120.63±1292584.15	26968299.72±515857.57	25557610.39±271090.70	332403048.97±51835253.45
91	D-Lyxose	19219779.59±324055.02	17313260.32±1521977.78	20002166.06±940409.14	8363839.42±949167.61
92	D-Xylose	695468075.03±23982002.24	430948105.67±92361900.55	305763892.83±3172316.14	92467258.10±13281004.76
93	Fructose 1,6-bisphosphate	143831472.03±5347181.73	108305064.30±4919424.67	248836598.63±8294853.39	225744377.50±10439767.34
94	Geniposide	10780765.80±1020144.75	12695779.14±1933438.09	6279700.91±793616.79	4670388.26±567233.81
95	Gluconolactone	125779041.03±20006163.92	71157594.12±283695.90	56326814.26±7153418.94	156250968.67±18250690.22
96	Manninotriose	1509873.29±281319.27	1671309.00±210692.27	7508154.60±340377.08	73925558.29±9502578.07
97	Sucrose	6024956.74±36854.21	4702173.32±48222.35	3964055.22±128530.92	41280660.26±10246087.77
98	(-)-Jasmonic acid	5816502.90±855340.82	9198055.07±663309.24	107512395.62±7021417.31	111213493.72±20667318.67
99	2-Isopropylmalic acid	106211544.20±75182294.15	120261507.53±3998713.86	107091756.37±3176202.17	2879680.79±919196.61
100	2-Methylglutaric acid	4686600.25±696208.00	8095730.81±2323342.87	25892713.88±1358473.22	15681686.50±8740399.71
101	6-Aminohexanoate	48181549.02±2500800.03	65739214.09±9340850.63	1661452203.33±39123316.99	1857655350.33±222047145.20
102	Azelaic acid	10488306.77±725884.57	8730954.26±1121642.49	3750328.48±435727.59	43613.09±11843.03
103	Citramalic acid	288864736.77±3612227.13	260326503.07±25925725.34	155711725.40±3227818.60	47502712.03±43438318.96
104	D-Phenyllactic acid	20705457.06±3767084.59	25633489.69±4239294.20	44744876.85±1058693.79	19840833.19±2762068.42
105	Glutaric acid	1309104.71±471297.88	1317194.54±174604.96	11468856.42±413686.38	1567730.91±327186.95
106	Isocitrate	662699871.37±29214550.34	617536454.20±44553189.42	339298274.47±3110035.65	18026765.04±2176757.20
107	Isovaleric acid	1457333.53±100448.30	1384059.33±54006.50	1429314.07±39398.75	33219452.86±3257197.44
108	Mandelic acid	3308659.03±1318836.14	4034469.66±2532992.18	6142516.95±2992766.35	33053407.24±3287394.26
109	Maslinic acid	27162142.12±2907494.76	23870645.00±4460427.30	59536488.59±24302868.97	20911206.84±9071334.30
110	p-Anisic acid	3464783.90±2675771.17	4216014.84±3306292.41	14244340.06±4784199.04	1470761.46±221637.56
111	Succinic acid	562483525.00±18408479.47	636464638.47±21104496.30	1485149484.67±30168288.80	1915763112.33±227456124.63
112	Abrine	1186837.40±62322.66	1328328.78±95165.79	1807699.59±57476.76	31513177.82±1842772.08
113	Anabasine	453980530.50±61975305.55	879026264.20±335941391.44	585894870.23±126913194.64	148486578.64±120424946.81
114	Caffeine	24640284.71±1986567.54	20918479.26±3193234.52	92343861.77±3021208.80	16841101.09±8750396.80
115	Ecgonine methyl ester	83497797.16±14899156.41	100513092.47±6901542.21	63075203.61±3062595.96	18541858.30±7891120.42
116	Harmine	454037.78±77621.23	513846.67±112271.49	1002860.25±416137.91	33923731.65±3435912.00
117	Indolin-2-one	13268967.11±6009969.95	28780743.16±3247401.28	81125053.96±1765200.00	62256760.80±7337666.47
118	Lycorine	134747787.80±7356998.03	146107273.77±6733084.79	237429930.87±20779082.75	95320226.53±6660861.29
119	Niacinamide	634980883.73±108922728.91	29726036.94±5254865.06	26807777.83±2601021.00	1274184718.33±163491699.53
120	Nornicotine	32337873.22±2370262.91	65073144.88±1511939.86	233632428.70±8740589.57	144451973.77±19782341.01
121	Trigonelline	19610699.02±14401799.62	9263842.78±5976450.43	36013341.41±697240.29	3608079.40±281009.09
122	(-)-Catechin gallate	142203485.05±38297934.46	104818300.25±43653157.37	21470295.13±1890451.51	24212400.93±1726574.80
123	Epitheaflagallin 3-O-gallate	20637892.97±4723736.19	22808139.26±8500297.31	74463061.76±10516055.88	60822012.35±7424156.88
124	Esculetin	5022650.32±2281633.44	5792553.63±3298243.25	11001011.65±998361.55	211351319.70±17401946.22
125	Methoxsalen	46364.64±12110.04	88494.21±15067.32	1713055.43±1194093.73	37483571.02±2774498.84
126	Nodakenin	674540.68±19013.57	577919.79±10255.41	418265.23±23889.92	8742489.15±1104074.50
127	Scopoletin	424451.73±52170.26	436550.50±68808.24	4006418.57±998290.26	18026195.87±1195655.84
128	3-Hydroxymethylglutaric acid	30122394.48±24958197.42	72019069.98±44973802.60	183185186.72±67380510.25	557369541.87±89658459.84
129	5-Hydroxyindoleacetic acid	28102.42±13392.33	25325.19±11190.32	28596.08±10157.79	36329502.47±2085068.30
130	Eriodictyol	10885167.92±196828.14	57866732.24±24491641.07	42312792.04±13308049.40	149292432.00±35519493.28
131	Pipecolic acid	457580876.73±92032703.48	359960456.00±81990980.14	483230732.13±77257238.41	6177661090.67±1582987564.06
132	Thymol	43449841.75±7662199.51	30674845.57±2502278.50	959771216.37±136440062.92	455559108.90±22875828.99
133	10-Hydroxydecanoic acid	24291025.21±1480841.03	4971344.71±1266741.13	4122183.00±544298.99	49012753.19±8740195.20
134	13-L-Hydroperoxylinoleic acid	18368416.49±5263625.16	1320832.15±667072.32	1027790.23±994932.10	2860314.81±2560737.58
135	13S-hydroxyoctadecadienoic acid	52528919.31±17356286.60	4864833.92±953475.09	2864289.74±908441.42	6707654.30±6467868.71
136	9,10-Dihydroxy-12,13-epoxyoctadecanoate	63464058.73±9868805.19	5762987.89±1338774.90	7421349.44±1942012.70	42430038.42±2399351.69
137	9,10-Epoxyoctadecenoic acid	957599789.80±144364738.23	60469164.45±13239577.75	77895256.79±10960474.88	459381460.77±74539538.63
138	Alpha-Linolenic acid	100626443.64±9968666.13	44721791.14±3431231.04	58551457.08±10298755.07	37088582.54±3103482.17
139	Arachidic acid	21994037.16±4057406.04	41104469.65±8711935.70	15251138.23±13938826.52	46738037.20±27621342.59
140	Arachidonate	5786645.05±1099387.55	13942854.26±638594.60	12295078.86±4548042.26	14814711.74±1166692.59
141	Capric acid	19133770.46±221825.70	10132858.90±2528819.75	8418015.20±1247319.04	8900081.69±1262108.19
142	Citraconic acid	4761431.80±258186.61	161936915.23±58380366.38	177260786.80±29850446.81	69992017.61±12266088.56
143	Dibutyl phthalate	1528941.44±1153140.81	1786048.06±664868.48	5336795.47±507208.93	2637612.60±1231181.39
144	Docosahexaenoic acid	20834375.40±7309269.53	5831831.03±1294160.41	7826263.34±2431023.29	26005344.76±4857340.81
145	Dodecanedioic acid	7244283.19±926278.78	155779.68±14199.92	3656776.76±1555753.52	9662683.12±2918969.73
146	Dodecanoic acid	7840495.22±951166.38	10405772.07±3318456.07	17328444.94±8034299.68	17816883.34±4227343.59
147	Erucic acid	72192230.86±29887048.50	151760673.69±60518033.63	127921698.92±140636297.13	248830027.00±53134694.84
148	Ethyl caffeate	2789271.84±886373.35	1878058.37±1092495.40	2186868.48±245087.38	7296132.10±258343.30
149	Ethyl gallate	40625699.90±6055999.52	1819171.45±753336.35	3119487.98±611906.49	43356315.55±7641603.73
150	Linoleic acid	27294704.85±1764620.89	6182305.16±5368813.65	2336330.15±291129.68	10396247.60±4632268.68
151	LysoPA(16:0/0:0)	285195467.83±22951644.51	53186237.03±14214576.56	38996004.02±9783694.92	195922843.13±26781548.28
152	LysoPC(18:0)	41038103.35±27580780.80	30846086.76±28205366.16	21302418.75±15997002.82	62430636.10±29389357.08
153	Methyl jasmonate	35487690.44±10810180.25	8612610.74±1336172.94	11775763.52±1985017.00	65589539.45±7101264.70
154	Octadecanamide	342077426.90±158272105.97	464909333.20±152045743.07	481328324.96±338392081.76	808294695.17±111959816.63
155	Pelargonic acid	35236204.82±893873.27	17117354.74±868974.89	15283323.50±2986075.11	15552992.70±388262.09
156	Sebacic acid	29028680.80±2986550.72	409620.54±102500.24	360015.21±59387.02	24845490.09±2390257.16
157	Stearidonic acid	62818974.95±6517550.62	1771968.78±403439.54	2955192.86±566226.30	24399463.95±5833718.17
158	Suberic acid	20785364.13±2047291.96	11582496.61±4770948.24	23713882.42±19381329.16	84508811.87±46340888.95
159	4-Coumaroylshikimate	7796999.06±3710411.60	12681901.57±2150971.85	5609509.11±3360342.52	5504137.17±617491.48

## Sheet: Table S3
Table S3. The relative content of 85 volatile components
No.	name	CAS号	odor description	class	FTL	WTL	ZTL	DTL
1	1-Penten-3-ol	616-25-1	fruity	alcohols	6871096.33±151545.36	13669705.67±404810.82	51819225.33±1705251.39	24414473.33±70097.18
2	CIS-2-PENTEN-1-OL	1576-95-0	green	alcohols	1387443.00±53092.88	1999441.33±28710.65	7890299.00±391786.50	1639369.33±13980.53
3	4-Methylcyclohexanol	589-91-3	-	alcohols	477028.67±4620.96	-	4276991.67±104870.47	-
4	isoamylol	123-51-3	fruity	alcohols	370445.00±11987.08	744447.00±146663.20	2589905.33±235217.85	-
5	pentan-1-ol	58454-11-8	fruity	alcohols	138370.00±10646.86	161971.67±23055.97	386841.00±20778.93	226921.00±7215.61
6	ISOOCTYL ALCOHOL	26952-21-6	rose，sweet	alcohols	141729.33±10466.01	165019.67±31124.88	202545.67±13052.27	76169.67±1538.20
7	oct-1-en-3-ol	3391-86-4	fresh,sweet	alcohols	82842.33±2875.59	83254.00±11407.77	192225.67±12164.70	55001.33±796.80
8	N-[3-anilino-1-(5-methylfuran-2-yl)-3-oxoprop-1-en-2-yl]-2-iodobenzamide	5989-18-4	floral	alcohols	270229.67±6888.18	217755.33±7110.84	361980.33±15619.63	342490.33±5543.80
9	(Z)-hex-3-en-1-ol	928-96-1	fruity,fresh	alcohols	5823695.33±213431.06	13647879.00±591004.61	30302774.00±1131647.08	2506500.33±8369.96
10	(E)-hex-4-en-1-yn-3-ol	59095-52-2	fresh	alcohols	-	-	1414972.67±430670.43	-
11	trans-3-Hexen-1-ol	928-97-2	fruity,fresh,floral	alcohols	993248.00±46512.71	3027123.33±627023.24	8223457.33±1711113.80	1978535.00±34277.05
12	3-cyclopentylpropan-1-ol	767-05-5	-	alcohols	-	-	574946.33±10627.63	-
13	2,3-dimethylcyclohexan-1-ol	1502-24-5	-	alcohols	-	253139.00±7961.55	468093.33±9741.84	-
14	2,7-dimethylocta-2,6-diene	16736-42-8	rose	alcohols	-	-	-	208539.33±1198.65
15	(S)-CIS-VERBENOL	1845-30-3	green	alcohols	8365022.00±178028.80	5666568.00±232423.65	14764237.00±379661.58	1706595.67±15607.72
44	Benzaldehyde	100-52-7	sweet,fruity	aldehydes	859939.33±7440.76	915228.00±14103.92	7369136.00±112434.54	588397.33±12964.91
17	CARVEOL	99-48-9	floral	alcohols	-	-	-	1124141.00±22101.71
18	CIS-VERBENOL	473-67-6	herbal	alcohols	3457129.33±120743.60	3527695.67±105173.06	5128338.00±317355.88	454502.33±2149.00
19	S,S,S,S,S-Trandolapril Hydrochloride	13040-03-4	lemon	alcohols	1117746.67±241202.37	1163491.00±120839.35	1011257.67±8603.48	141472.00±4800.63
20	2-Phenylethanol	60-12-8	rose	alcohols	596899.00±67490.21	521800.00±4539.00	-	-
21	DIHYDRO CUMINYL ALCOHOL	536-59-4	sweet,woody,floral	alcohols	334073.00±3718.60	268684.00±18541.43	758102.67±25335.04	-
22	Hotrienol	20053-88-7	fruity,floral	alcohols	-	-	-	594636.33±5877.53
23	Nerolidol	7212-44-4	floral,woody	alcohols	33244.67±3547.23	47595.67±3900.99	867168.33±10427.83	355041.33±4726.82
24	Toluene	108-88-3	sweet	aromatic compounds	249363.33±3638.69	259897.67±2477.84	409789.00±6338.07	790619.33±3453.86
25	Naphthalene	91-20-3	-	aromatic compounds	1080983.67±139676.74	475872.00±11420.34	173271.67±32172.84	-
26	1,6-DIMETHYL-4-OXO-1,4-DIHYDRO-3-PYRIDINECARBOXYLIC ACID	33821-59-9	-	aromatic compounds	-	-	379491.00±5800.29	569384.33±4714.51
27	DL-3-Methylvaleric acid	105-43-1	green	others	1117130.33±19366.43	1182352.33±6385.32	1663388.33±98760.22	653720.33±6113.92
28	2-Ethylfuran	3208-16-0	roasted sweet	others	4006662.33±154628.02	5929575.00±102974.18	8207040.00±502078.49	5361101.67±195990.36
29	2-METHYLBUTYRONITRILE	18936-17-9	-	others	-	-	881779.67±184934.83	524687.00±5868.03
30	3-Methylbutanenitrile	625-28-5	-	others	-	94132.33±6019.47	329826.67±19524.97	147115.33±1600.84
31	2-METHYL-3-PENTANONE	565-69-5	mint	others	152114.33±14818.93	270788.33±56542.82	168409.33±7637.29	110448.67±5619.85
32	Hexamethylcyclotrisiloxane	541-05-9	-	others	100039.67±1989.50	129757.00±19660.39	136408.00±5260.28	698962.00±11306.91
33	Decamethylcyclopentasiloxane	541-02-6	-	others	435388.67±14450.14	521565.33±17879.81	583806.33±20347.47	116738.00±10487.25
34	Indole	120-72-9	orange,jasmine	others	42874.00±8364.27	-	3365533.67±72011.76	1857489.33±17271.31
35	DODECAMETHYLCYCLOHEXASILOXANE	540-97-6	-	others	1636571.33±69969.96	2296033.33±119646.71	2106455.67±83608.50	241707.67±4347.30
36	Tetradecamethylcycloheptasiloxane	107-50-6	-	others	140307.00±5103.39	209165.33±14636.44	239479.67±8442.19	90472.67±1161.43
37	Isobutyraldehyde	78-84-2	fresh,sweet	aldehydes	3582516.00±130115.13	6665397.67±281548.03	47134500.67±8952.21	10285011.00±246059.67
38	2-Methylbutyraldehyde	96-17-3	sweet,fruity	aldehydes	2727859.33±107774.33	5528217.00±256411.49	14033590.67±428946.83	4598012.33±16850.88
39	Tiglic aldehyde	1115-11-3	green,fruity	aldehydes	-	-	-	572682.33±8167.95
40	CIS-4-HEPTENAL	6728-31-0	fresh,sweet	aldehydes	260630.00±2130.09	343326.00±16071.93	757557.33±49888.05	464192.00±10179.69
41	Hexanal	66-25-1	green,fruity,orange	aldehydes	1280149.00±65301.16	1352221.67±78384.45	4025310.67±394812.78	1092523.33±71269.89
42	TRANS-2-HEXENAL	6728-26-3	fresh,fruity	aldehydes	180087.00±4552.96	354015.67±39159.06	903313.00±7596.85	76169.67±1538.20
43	Heptaldehyde	111-71-7	green,fruity	aldehydes	357972.00±13600.02	588281.00±94426.10	1132014.00±111740.28	-
44	Benzaldehyde	100-52-7	sweet,fruity	aldehydes	859939.33±7440.76	915228.00±14103.92	7369136.00±112434.54	588397.33±12964.91
45	(E,E)-3,5-BIS-(4-PHENYL-1	-	woody,fruity,orange	aldehydes	2420698.67±136308.38	2606421.33±40698.44	5386936.67±38737.15	3052042.00±99414.74
46	2,6-dimethylcyclohex-3-ene-1-carbaldehyde	6975-94-6	-	aldehydes	-	139021.67±21231.98	335614.00±10502.27	137705.67±8046.69
47	BETA-CYCLOCITRAL	432-25-7	rose,herbal	aldehydes	83355.33±2488.67	62902.67±2581.98	85226.00±860.18	89530.00±424.82
48	DL-Limonene	138-86-3	herbal,orange	terpenes	-	144768.67±13602.75	354161.33±20278.59	104614.33±5249.34
49	DIPENTENE	138-86-3	sweet,orange	terpenes	818683.33±17825.64	973805.33±34921.11	1204733.33±41685.05	1356548.33±13437.61
50	(+)-α-Pinene	7785-70-8	fresh	terpenes	335562.67±16977.40	298097.00±15839.76	656364.67±13882.39	496050.67±9326.49
51	(E)-3,7-dimethylocta-1,3,6-triene	3779-61-1	green,floral	terpenes	219744.33±8643.19	251357.00±8059.08	6605218.67±414304.86	2167536.33±104063.68
52	3-CARENE	13466-78-9	woody,orange	terpenes	80655608.00±1544803.01	77464456.00±1457796.21	89773250.67±1057673.74	17280695.33±338227.41
53	(3E,5E)-2,6-Dimethyl-1,3,5,7-octatetrene	460-01-5	sweet,floral,woody	terpenes	-	60392.67±21442.07	-	12065127.67±492516.10
54	β-Caryophyllene	87-44-5	floral,woody	terpenes	14575.00±7454.15	16854.67±7833.82	4433740.00±153096.40	5080511.67±152110.56
55	α-bergamotene	17699-05-7	lemon	terpenes	3131458.00±32152.59	4583715.00±120222.12	4903128.67±313372.82	705590.33±9181.97
56	CEDRENE	11028-42-5	woody	terpenes	54182.33±2327.64	38795.33±5948.72	39306.67±1063.66	-
57	Aromadendrene oxide 2	85710-39-0	woody	terpenes	-	-	126161.00±5135.71	108340.00±7736.56
58	(E)-BETA-FARNESENE	18794-84-8	woody,orange	terpenes	43517.00±7851.85	46965.67±6537.40	57128.00±2163.63	38894.67±497.68
59	(Z,E)-ALPHA-FARNESENE	26560-14-5	herbal,orange	terpenes	-	-	93506.33±8590.73	293737.00±5808.70
60	(-)-ALPHA-CEDRENE	469-61-4	woody	terpenes	135072.67±19748.97	65700.67±9088.90	61950.33±6317.15	81726.00±1873.76
61	FARNESENE	502-61-4	herbal,orange	terpenes	45421.00±4173.36	93402.67±3153.72	1068304.00±17380.68	5404113.00±176728.81
62	(+)-DELTA-CADINENE	483-76-1	woody	terpenes	-	-	-	119565.33±397.87
63	1-Methylcyclopentene	693-89-0	-	alkanes	539321.67±9407.23	550935.33±66725.84	2245134.67±36456.39	3498012.33±93675.43
64	3,5,5-TRIMETHYL-1-HEXENE	4316-65-8	-	alkanes	267403.00±15765.12	368334.00±13691.72	1984936.00±277464.03	-
65	n-Hendecane	1120-21-4	-	alkanes	282323.00±6926.60	622050.33±36869.09	944375.33±124594.47	324192.00±8291.33
66	1-Hexen-3-yne, 2,5,5-trimethyl-	37439-53-5	-	alkanes	-	-	116016.67±8287.76	-
67	1-METHYL-1-CYCLOHEXENE	591-49-1	lemon,orange	alkanes	1076794.67±42147.44	688698.67±93558.91	1962893.67±402519.60	745036.00±9649.35
68	2-Cyano-4,4-dimethyl-pent-2-enoic acid	88319-37-3	-	alkanes	2833951.33±34477.21	2621440.00±89660.93	5900272.67±192853.17	722576.67±4901.84
69	2,2,4,6,6-PENTAMETHYLHEPTANE	13475-82-6	-	alkanes	376779.33±15562.53	546733.00±8849.65	453780.67±4940.35	181872.67±5049.43
70	2,6,10-TRIMETHYLDODECANE	3891-98-3	-	alkanes	66614.00±4188.77	77928.67±3808.44	74013.00±358.95	-
71	Tetradecane	629-59-4	floral,fruity	alkanes	255562.33±8898.94	230628.00±17091.34	215445.67±3281.97	149556.67±403.99
72	N-HEXADECANE-D34	544-76-3	floral	alkanes	556223.33±13141.39	228341.67±9109.77	166495.67±3111.92	125177.67±4169.57
73	Methyl hexanoate	106-70-7	fruity	esters	-	-	309628.00±25363.92	75001.33±796.80
74	Methyl hex-3-enoate	2396-78-3	fruity	esters	-	-	215357.33±10112.11	-
75	HEPTYL FORMATE	112-23-2	floral	esters	162851.00±9879.02	296137.00±6437.37	293925.00±5579.35	-
76	cis-3-Hexenyl Acetate	3681-71-8	freen,fruity,sweet	esters	7610964.33±208359.45	12256284.33±621250.42	2270274.33±89142.41	87947.67±942.81
77	Hexyl acetate	142-92-7	fruity	esters	-	260401.00±35201.48	805424.67±16990.03	107982.67±4086.10
78	cis-3-Hexenyl lactate	61931-81-5	-	esters	-	141722.00±13583.67	-	-
79	Ethyl forMate	-	fruity	esters	560787.00±31421.87	347652.67±26138.95	-	307023.33±3683.72
80	CIS-3-HEXENYL BUTYRATE	16491-36-4	fresh,fruity	esters	455837.33±4329.00	973046.67±58721.89	5437433.33±72044.79	1811889.67±12410.82
81	Methyl salicylate	119-36-8	green,mint	esters	9394757.00±224201.31	8260399.33±148804.22	13160737.33±557907.77	1276772.00±66177.73
82	FEMA 3498	35154-45-1	fruity	esters	219098.00±12580.56	365975.33±2389.04	1334738.67±11542.86	562178.00±5079.70
83	cis-3-Hexenyl hexanoate	31501-11-8	fresh,fruity,orange	esters	94982.67±8195.95	204652.00±11488.03	1668826.67±25650.69	2594494.33±84754.24
84	Hexyl hexanoate	6378-65-0	fruity	esters	56091.33±3134.76	103538.33±3039.41	661275.00±14702.23	1488324.00±77121.68
85	(Z)-3-hexen-1-yl caproate	31501-11-8	green,fruity	esters	20955.33±6157.42	41887.67±1331.84	217956.67±5129.63	348008.33±7788.06

## Sheet: Table S4
Table S4. The information on 42 differential volatile metabolites
No.	name	CAS	odor description	class	FTL	WTL	ZTL	DTL
1	1-Penten-3-ol	616-25-1	fruity	alcohols	6871096.33±151545.36	13669705.67±404810.82	51819225.33±1705251.39	24414473.33±70097.18
2	CIS-2-PENTEN-1-OL	1576-95-0	green	alcohols	1387443.00±53092.88	1999441.33±28710.65	7890299.00±391786.50	1639369.33±13980.53
3	pentan-1-ol	58454-11-8	fruity	alcohols	138370.00±10646.86	161971.67±23055.97	386841.00±20778.93	226921.00±7215.61
4	ISOOCTYL ALCOHOL	26952-21-6	rose，sweet	alcohols	141729.33±10466.01	165019.67±31124.88	202545.67±13052.27	76169.67±1538.20
5	oct-1-en-3-ol	3391-86-4	fresh,sweet	alcohols	82842.33±2875.59	83254.00±11407.77	192225.67±12164.70	55001.33±796.80
6	(Z)-hex-3-en-1-ol	928-96-1	fruity,fresh	alcohols	5823695.33±213431.06	13647879.00±591004.61	30302774.00±1131647.08	2506500.33±8369.96
7	trans-3-Hexen-1-ol	928-97-2	fruity,fresh,floral	alcohols	993248.00±46512.71	3027123.33±627023.24	8223457.33±1711113.80	1978535.00±34277.05
8	cis-VERBENOL	1845-30-3	green	alcohols	8365022.00±178028.80	5666568.00±232423.65	14764237.00±379661.58	1706595.67±15607.72
9	(S)-CIS-VERBENOL	473-67-6	green	alcohols	8365022.00±178028.80	5666568.00±232423.65	14764237.00±379661.58	1706595.67±15607.72
10	S,S,S,S,S-Trandolapril Hydrochloride	13040-03-4	lemon	alcohols	1117746.67±241202.37	1163491.00±120839.35	1011257.67±8603.48	141472.00±4800.63
11	Hotrienol	20053-88-7	fruity,floral	alcohols	-	-	-	594636.33±5877.53
12	Isobutyraldehyde	78-84-2	fresh,sweet	aldehydes	3582516.00±130115.13	6665397.67±281548.03	47134500.67±8952.21	10285011.00±246059.67
13	2-Methylbutyraldehyde	96-17-3	sweet,fruity	aldehydes	2727859.33±107774.33	5528217.00±256411.49	14033590.67±428946.83	4598012.33±16850.88
14	CIS-4-HEPTENAL	6728-31-0	fresh,sweet	aldehydes	260630.00±2130.09	343326.00±16071.93	757557.33±49888.05	464192.00±10179.69
15	Hexanal	66-25-1	green,fruity,orange	aldehydes	1280149.00±65301.16	1352221.67±78384.45	4025310.67±394812.78	1092523.33±71269.89
16	TRANS-2-HEXENAL	6728-26-3	fresh,fruity	aldehydes	180087.00±4552.96	354015.67±39159.06	903313.00±7596.85	76169.67±1538.20
17	Benzaldehyde	100-52-7	sweet,fruity	aldehydes	859939.33±7440.76	915228.00±14103.92	7369136.00±112434.54	588397.33±12964.91
18	(E,E)-3,5-BIS-(4-PHENYL-1	-	woody,fruity,orange	aldehydes	2420698.67±136308.38	2606421.33±40698.44	5386936.67±38737.15	3052042.00±99414.74
19	1-Methylcyclopentene	693-89-0	-	alkanes	539321.67±9407.23	550935.33±66725.84	2245134.67±36456.39	3498012.33±93675.43
20	n-Hendecane	1120-21-4	-	alkanes	282323.00±6926.60	622050.33±36869.09	944375.33±124594.47	324192.00±8291.33
21	2-Cyano-4,4-dimethyl-pent-2-enoic acid	88319-37-3	-	alkanes	2833951.33±34477.21	2621440.00±89660.93	5900272.67±192853.17	722576.67±4901.84
22	2,2,4,6,6-PENTAMETHYLHEPTANE	13475-82-6	-	alkanes	376779.33±15562.53	546733.00±8849.65	453780.67±4940.35	181872.67±5049.43
23	N-HEXADECANE-D34	544-76-3	floral	alkanes	556223.33±13141.39	228341.67±9109.77	166495.67±3111.92	125177.67±4169.57
24	cis-3-Hexenyl Acetate	3681-71-8	freen,fruity,sweet	esters	7610964.33±208359.45	12256284.33±621250.42	2270274.33±89142.41	87947.67±942.81
25	CIS-3-HEXENYL BUTYRATE	16491-36-4	fresh,fruity	esters	455837.33±4329.00	973046.67±58721.89	5437433.33±72044.79	1811889.67±12410.82
26	Methyl salicylate	119-36-8	green,mint	esters	9394757.00±224201.31	8260399.33±148804.22	13160737.33±557907.77	1276772.00±66177.73
27	FEMA 3498	35154-45-1	fruity	esters	219098.00±12580.56	365975.33±2389.04	1334738.67±11542.86	562178.00±5079.70
28	cis-3-Hexenyl hexanoate	31501-11-8	fresh,fruity,orange	esters	94982.67±8195.95	204652.00±11488.03	1668826.67±25650.69	2594494.33±84754.24
29	Hexyl hexanoate	6378-65-0	fruity	esters	56091.33±3134.76	103538.33±3039.41	661275.00±14702.23	1488324.00±77121.68
30	(Z)-3-hexen-1-yl caproate	31501-11-8	green,fruity	esters	20955.33±6157.42	41887.67±1331.84	217956.67±5129.63	348008.33±7788.06
31	DL-3-Methylvaleric acid	105-43-1	green	others	1117130.33±19366.43	1182352.33±6385.32	1663388.33±98760.22	653720.33±6113.92
32	Hexamethylcyclotrisiloxane	541-05-9	-	others	100039.67±1989.50	129757.00±19660.39	136408.00±5260.28	698962.00±11306.91
33	Decamethylcyclopentasiloxane	541-02-6	-	others	435388.67±14450.14	521565.33±17879.81	583806.33±20347.47	116738.00±10487.25
34	DODECAMETHYLCYCLOHEXASILOXANE	540-97-6	-	others	1636571.33±69969.96	2296033.33±119646.71	2106455.67±83608.50	241707.67±4347.30
35	Tetradecamethylcycloheptasiloxane	107-50-6	-	others	140307.00±5103.39	209165.33±14636.44	239479.67±8442.19	90472.67±1161.43
36	(+)-α-Pinene	7785-70-8	fresh	terpenes	335562.67±16977.40	298097.00±15839.76	656364.67±13882.39	496050.67±9326.49
37	(E)-3,7-dimethylocta-1,3,6-triene	3779-61-1	green,floral	terpenes	219744.33±8643.19	251357.00±8059.08	6605218.67±414304.86	2167536.33±104063.68
38	3-CARENE	13466-78-9	woody,orange	terpenes	80655608.00±1544803.01	77464456.00±1457796.21	89773250.67±1057673.74	17280695.33±338227.41
39	β-Caryophyllene	87-44-5	floral,woody	terpenes	14575.00±7454.15	16854.67±7833.82	4433740.00±153096.40	5080511.67±152110.56
40	α-bergamotene	17699-05-7	lemon	terpenes	3131458.00±32152.59	4583715.00±120222.12	4903128.67±313372.82	705590.33±9181.97
41	(-)-ALPHA-CEDRENE	469-61-4	woody	terpenes	135072.67±19748.97	65700.67±9088.90	61950.33±6317.15	81726.00±1873.76
42	(E)-BETA-FARNESENE	18794-84-8	woody,orange	terpenes	43517.00±7851.85	46965.67±6537.40	57128.00±2163.63	38894.67±497.68

## Sheet: Table S5
Table S5. 27 key precursors or transformed volatile components during Aijiao oolong tea processing
No.	name	CAS	odor description	class	FTL	WTL	ZTL	DTL
1	1-Penten-3-ol	616-25-1	fruity	alcohols	6871096.33±151545.36	13669705.67±404810.82	51819225.33±1705251.39	24414473.33±70097.18
2	oct-1-en-3-ol	3391-86-4	fresh,sweet	alcohols	82842.33±2875.59	83254.00±11407.77	192225.67±12164.70	55001.33±796.80
3	(Z)-hex-3-en-1-ol	928-96-1	fruity,fresh	alcohols	5823695.33±213431.06	13647879.00±591004.61	30302774.00±1131647.08	2506500.33±8369.96
4	cis-VERBENOL	1845-30-3	green	alcohols	8365022.00±178028.80	5666568.00±232423.65	14764237.00±379661.58	1706595.67±15607.72
5	(S)-CIS-VERBENOL	473-67-6	green	alcohols	8365022.00±178028.80	5666568.00±232423.65	14764237.00±379661.58	1706595.67±15607.72
6	S,S,S,S,S-Trandolapril Hydrochloride	13040-03-4	lemon	alcohols	1117746.67±241202.37	1163491.00±120839.35	1011257.67±8603.48	141472.00±4800.63
7	Nerolidol	7212-44-4	floral,woody	alcohols	33244.67±3547.23	47595.67±3900.99	867168.33±10427.83	355041.33±4726.82
8	trans-3-Hexen-1-ol	928-97-2	fruity,fresh,floral	alcohols	993248.00±46512.71	3027123.33±627023.24	8223457.33±1711113.80	1978535.00±34277.05
9	2-Phenylethanol	60-12-8	rose	alcohols	596899.00±67490.21	521800.00±4539.00	-	-
10	Hotrienol	20053-88-7	fruity,floral	alcohols	-	-	-	594636.33±5877.53
11	isoamylol	123-51-3	fruity	alcohols	370445.00±11987.08	744447.00±146663.20	2589905.33±235217.85	-
12	Indole	120-72-9	orange,jasmine	others	42874.00±8364.27	-	3365533.67±72011.76	1857489.33±17271.31
13	CIS-4-HEPTENAL	6728-31-0	fresh,sweet	aldehydes	260630.00±2130.09	343326.00±16071.93	757557.33±49888.05	464192.00±10179.69
14	Hexanal	66-25-1	green,fruity,orange	aldehydes	1280149.00±65301.16	1352221.67±78384.45	4025310.67±394812.78	1092523.33±71269.89
15	TRANS-2-HEXENAL	6728-26-3	fresh,fruity	aldehydes	180087.00±4552.96	354015.67±39159.06	903313.00±7596.85	76169.67±1538.20
16	Heptaldehyde	111-71-7	green,fruity	aldehydes	357972.00±13600.02	588281.00±94426.10	1132014.00±111740.28	-
17	Benzaldehyde	100-52-7	sweet,fruity	aldehydes	859939.33±7440.76	915228.00±14103.92	7369136.00±112434.54	588397.33±12964.91
18	2-Methylbutyraldehyde	96-17-3	sweet,fruity	aldehydes	2727859.33±107774.33	5528217.00±256411.49	14033590.67±428946.83	4598012.33±16850.88
19	Isobutyraldehyde	78-84-2	fresh,sweet	aldehydes	3582516.00±130115.13	6665397.67±281548.03	47134500.67±8952.21	10285011.00±246059.67
20	(E)-BETA-FARNESENE	18794-84-8	woody,orange	terpenes	43517.00±7851.85	46965.67±6537.40	57128.00±2163.63	38894.67±497.68
21	(E)-3,7-dimethylocta-1,3,6-triene	3779-61-1	green,floral	terpenes	219744.33±8643.19	251357.00±8059.08	6605218.67±414304.86	2167536.33±104063.68
22	(+)-α-Pinene	7785-70-8	fresh	terpenes	335562.67±16977.40	298097.00±15839.76	656364.67±13882.39	496050.67±9326.49
23	(+)-DELTA-CADINENE	483-76-1	woody	terpenes	-	-	-	119565.33±397.87
24	(Z)-3-hexen-1-yl caproate	31501-11-8	green,fruity	esters	20955.33±6157.42	41887.67±1331.84	217956.67±5129.63	348008.33±7788.06
25	cis-3-Hexenyl Acetate	3681-71-8	freen,fruity,sweet	esters	7610964.33±208359.45	12256284.33±621250.42	2270274.33±89142.41	87947.67±942.81
26	CIS-3-HEXENYL BUTYRATE	16491-36-4	fresh,fruity	esters	455837.33±4329.00	973046.67±58721.89	5437433.33±72044.79	1811889.67±12410.82
27	Methyl salicylate	119-36-8	green,mint	esters	9394757.00±224201.31	8260399.33±148804.22	13160737.33±557907.77	1276772.00±66177.73
